## Structural effects and functional implications of phalloidin and jasplakinolide binding to actin filaments

Sabrina Pospich<sup>1</sup>, Felipe Merino<sup>1</sup> and Stefan Raunser<sup>1\*</sup>

<sup>1</sup>Department of Structural Biochemistry, Max Planck Institute of Molecular Physiology, Dortmund, 44227, Germany

\*Correspondence to [Stefan.Raunser@mpi-dortmund.mpg.de](mailto:Stefan.Raunser@mpi-dortmund.mpg.de)

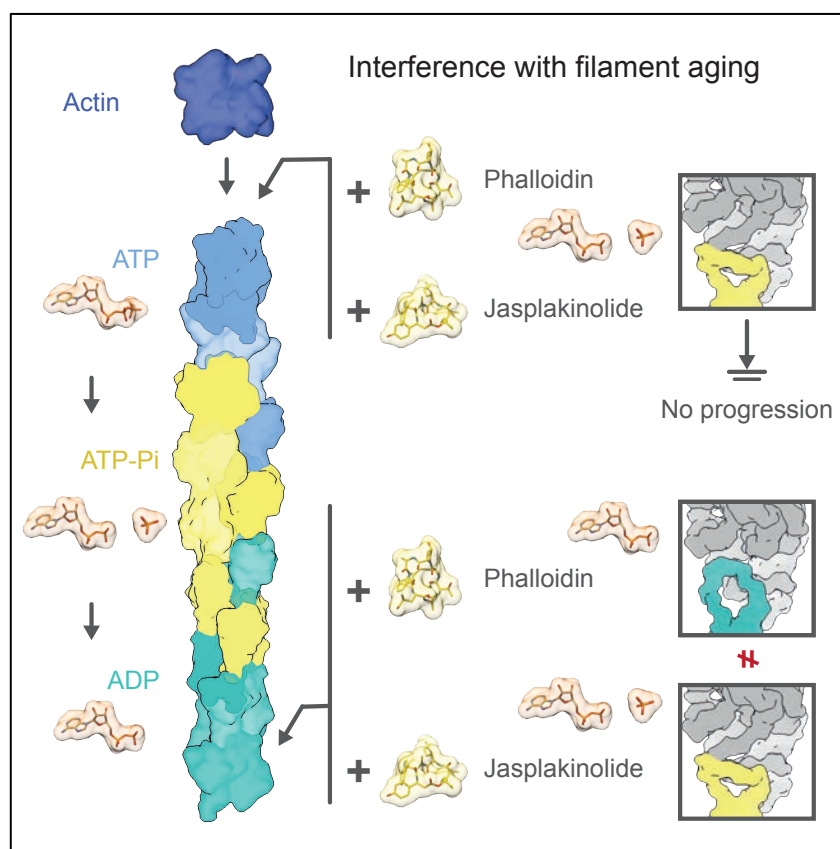

### Highlights

- Five high-resolution cryo-EM structures of stabilized filamentous actin
- Phalloidin traps different structural states depending on when it is added
- The effect of phalloidin and jasplakinolide on filamentous actin is not identical
- Both toxins likely interfere with the binding of proteins sensing F-actin's nucleotide state

# 1                    **Structural effects and functional implications of phalloidin and** 2                    **jasplakinolide binding to actin filaments**

3  
4  
5 Sabrina Pospich<sup>1</sup>, Felipe Merino<sup>1</sup> and Stefan Raunser<sup>1\*</sup>

6  
7 *<sup>1</sup>Department of Structural Biochemistry, Max Planck Institute of Molecular Physiology,*  
8 *Dortmund, 44227, Germany*

9  
10 \*Correspondence to [Stefan.Raunser@mpi-dortmund.mpg.de](mailto:Stefan.Raunser@mpi-dortmund.mpg.de)

## 11 12 13 **Summary**

14  
15 Actin undergoes structural transitions during polymerization, ATP hydrolysis and subsequent  
16 release of inorganic phosphate. Several actin binding proteins sense specific states during this  
17 transition and can thus target different regions of the actin filament. Here we show in atomic  
18 detail that phalloidin, a mushroom toxin that is routinely used to stabilize and label actin  
19 filaments, suspends the structural changes in actin, likely influencing its interaction with actin  
20 binding proteins. Furthermore, high-resolution cryo-EM structures reveal structural  
21 rearrangements in F-actin upon inorganic phosphate release in phalloidin-stabilized filaments.  
22 We find that the effect of the sponge toxin jasplakinolide differs from the one of phalloidin,  
23 despite their overlapping binding site and similar interactions with the actin filament. Analysis  
24 of structural conformations of F-actin suggests that stabilizing agents trap states within the  
25 natural conformational space of actin.

## 26 27 28 **Keywords**

29 F-actin, phalloidin, jasplakinolide, structural transition, phosphate release, conformational  
30 coupling, nucleotide recognition, cryo-EM

## 34 **Introduction**

35 Actin is a highly conserved and abundant protein which is essential for many key processes  
36 including cell motility, muscle contraction and vesicle trafficking (Pollard and Cooper, 2009).  
37 The 42 kDa protein consists of four subdomains (SDs) enclosing the central metal-nucleotide  
38 binding site, which is occupied by  $Mg^{2+}$ -ATP in globular actin (G-actin) (Kabsch et al., 1990).  
39 Under physiological conditions, G-actin spontaneously polymerizes into a double stranded  
40 right-handed helix (F-actin) that is stabilized by interactions between subunits of the same  
41 strand (intra-strand interactions) and across strands (inter-strand interactions) (Holmes et al.,  
42 1990).

43 During polymerization, G-actin undergoes a conformational change, resulting in the  
44 flatter appearance of actin subunits in F-actin (Oda et al., 2009) and a rotation of His161 into  
45 its catalytic position (Merino et al., 2018) enhancing the actin-ATPase activity by four orders  
46 of magnitude (Blanchoin and Pollard, 2002). ATP hydrolysis is followed by the slow release  
47 of inorganic phosphate ( $P_i$ ), which leaves ADP in the nucleotide-binding pocket of ‘aged’ F-  
48 actin. Thus, F-actin subunits pass through at least three different conformational states, namely  
49 the ATP state, the ADP- $P_i$  state and the ADP state (Carlier and Pantaloni, 1986). The final ADP  
50 state is the least stable of the three states (Merino et al., 2018; Pollard, 1986). Due to the faster  
51 addition of ATP-bound G-actin to the barbed end, F-actin displays a characteristic nucleotide  
52 gradient along the filament, which marks the local age of the polymer.

53 We recently showed that nucleotide hydrolysis and  $P_i$  release in F-actin modulate the  
54 conformation of the periphery of the filament (Merino et al., 2018). In particular, we identified  
55 two distinct conformations which we named open and closed D-loop states based on substantial  
56 structural differences in the DNase-I-binding loop (D-loop). The open D-loop state is  
57 characterized by an outwards bent D-loop and an extended C-terminus. In the closed  
58 conformation, the D-loop is folded in and the C-terminus adopts a helical fold. We found that  
59 the two D-loop states coexist in the ATP-like and ADP- $P_i$  states of F-actin whereas in F-actin-  
60 ADP, the D-loop is only found in its closed state. Another study also reported changes within  
61 the D-loop/C-terminus interface upon  $P_i$  release (Chou and Pollard, 2019). In general, this  
62 highlights the importance of this site, which is likely sensed by actin-binding proteins (ABP)  
63 like cofilin and coronin (Cai et al., 2007; Ge et al., 2014; Merino et al., 2018; Suarez et al.,  
64 2011).

65 Traditionally, natural compounds, such as phalloidin or jasplakinolide have been used  
66 to stabilize and study actin filaments. Phalloidin is a bicyclic heptapeptide originally isolated  
67 from the death cap mushroom *Amanita phalloides* (Lynen and U. Wieland, 1938) and well

68 known for its specific, stoichiometric binding to F-actin (Estes et al., 1981; T. Wieland and  
69 Govindan, 1974). Jaspilakinolide (JASP), a cyclic depsipeptide originally isolated from the  
70 marine sponge *Jaspis johnstoni* (Crews et al., 1986), shares this characteristics and  
71 competitively inhibits the binding of phalloidin to F-actin (Bubb et al., 1994). Both toxins  
72 stabilize actin filaments and prevent depolymerization even under harsh conditions (Dancker  
73 et al., 1975; Lengsfeld et al., 1974). Under non-polymerizing conditions, they promote  
74 polymerization (Bubb et al., 1994; Estes et al., 1981). JASP has been reported to stabilize F-  
75 actin more effectively than phalloidin (Bubb et al., 2000; Visegrády et al., 2005; 2004). While  
76 both toxins do not affect ATP hydrolysis, they strongly delay the release of  $P_i$  (Barden et al.,  
77 1987; Dancker and Hess, 1990; Vig et al., 2011), suggesting a close correlation between  
78 filament stability and the presence of  $P_i$ .

79 Over the years tremendous effort was put into the design and synthesis of phalloidin and  
80 JASP derivatives to enable specific labeling of actin filaments and to exploit their potential as  
81 therapeutics in anticancer or antimalaria therapy (Anderl et al., 2012; Holzinger, 2009;  
82 Lukinavičius et al., 2014; Terracciano et al., 2005; E. Wulf et al., 1979; Yao et al., 2019).  
83 Phalloidin is widely used to stabilize F-actin in electron microscopy studies and is a common  
84 marker for F-actin in fluorescence light microscopy when conjugated to fluorophores (Melak  
85 et al., 2017). Despite its advantage of cell permeability over phalloidin, JASP has only rarely  
86 been used for the same purpose.

87 First experiments using X-ray fiber diffraction, mutational studies, scanning  
88 transmission electron microscopy or computational docking (Belmont et al., 1999a; Drubin et  
89 al., 1993; Lorenz et al., 1993; Oda et al., 2005; Steinmetz et al., 1998), identified the binding  
90 site of phalloidin at the interface of three actin protomers, but failed to determine its exact  
91 position within the filament. Only recent high-resolution electron cryo microscopy (cryo-EM)  
92 studies revealed the exact interaction of phalloidin and JASP with F-actin (Iwamoto et al., 2018;  
93 Mentés et al., 2018; Merino et al., 2018; Pospich et al., 2017). Both toxins bind non-covalently  
94 to the same site consisting of three actin subunits from both strands and stabilize the filament  
95 by extensive hydrophobic interactions. Additional hydrogen bonds have been proposed to  
96 stabilize the interaction with phalloidin (Mentes et al., 2018).

97 In our latest study, we found that JASP traps the open D-loop conformation and inhibits  
98  $P_i$  release when added immediately before polymerization of either G-actin-ATP or G-actin-  
99 ADP (Merino et al., 2018). Interestingly, the open D-loop state has not been observed in the  
100 structures of phalloidin-stabilized F-actin in complex with myosin or filamin A, which could  
101 be due to differences between JASP and phalloidin or the binding of myosin and filamin A

102 (Iwamoto et al., 2018; Menten et al., 2018). Considering this, the question arises if JASP and  
103 phalloidin act indeed in the same way on F-actin as presumed hitherto based on their  
104 biochemical properties.

105 In this work we systematically studied the effect of phalloidin on the structure of F-actin  
106 and compared it to the effect JASP has on actin filaments using cryo-EM. We found that both  
107 stabilizing agents interfere with the natural aging process of F-actin, thus camouflaging the  
108 nucleotide state of F-actin that in turn cannot be sensed by ABPs anymore. Furthermore, we  
109 describe structural changes upon  $P_i$  release and their coupling in phalloidin-stabilized F-actin.  
110 Principle component analysis suggests that the structural conformations trapped in toxin-  
111 stabilized filaments are representative for conformational states of F-actin in general.

112

## 113 **Results and Discussion**

114

### 115 **The structural effect of phalloidin on F-actin**

116 First, we determined the cryo-EM structure of filamentous rabbit skeletal muscle  $\alpha$ -actin adding  
117 phalloidin immediately before polymerization (F-actin-PHD) to make sure that ATP complexed  
118 by actin was not hydrolyzed at the time phalloidin bound to F-actin. The average resolution of  
119 the reconstruction of  $\sim 3.3$  Å allowed the clear positioning of most side chains (Figure S1, Table  
120 1). The structure of F-actin-PHD closely resembles the structure of F-actin-ADP- $P_i$  JASP that  
121 was analogously prepared (Merino et al., 2018). The D-loop is well resolved and solely  
122 populates the open D-loop state (Figure 1A, Movie S1A-B), and the nucleotide binding pocket  
123 is occupied by ADP and  $P_i$  (Figure 2A, Movie S2A-B, Figure S2A). This is in line with previous  
124 reports where it was shown that JASP and phalloidin dramatically reduce the release of  $P_i$  from  
125 F-actin (Dancker and Hess, 1990; Vig et al., 2011). However, the density corresponding to  $P_i$   
126 is weaker in comparison to F-actin-ADP- $P_i$ -JASP (Merino et al., 2018), indicating that the  $P_i$   
127 affinity of F-actin-PHD is lower than in the JASP-bound F-actin. Since previous studies showed  
128 that JASP and phalloidin treatment results in similarly reduced  $P_i$  release rates (Vig et al., 2011),  
129 this shows that the  $k_{on}$  for  $P_i$  binding is higher in the case of F-actin-ADP- $P_i$ -JASP. Furthermore,  
130 phalloidin seems to interfere with the conformational coupling of the active site to the periphery  
131 considering that the low  $P_i$  occupancy in F-actin-PHD does not result in a mixture of  
132 conformational states but traps F-actin solely in the open D-loop state.

133 To distinguish whether the closed D-loop conformation of F-actin-ADP (Ecken et al.,  
134 2015; Merino et al., 2018) is changed when adding phalloidin after polymerization and aging  
135 of the filament, we determined the  $\sim 3.7$  Å cryo-EM structure of F-actin in complex with

136 phalloidin, in which the toxin was added one night after polymerization (F-actin-PHD-aged)  
137 (Figure S1, Table 1). This approach should guarantee that all ATP has been hydrolyzed and  $P_i$   
138 has been completely released from the filament. The structure revealed that although phalloidin  
139 binds stoichiometrically to F-actin, the D-loop remains in the closed state (Figure 1B, Movie  
140 S1C-D). Expectedly, the active site only accommodates ADP without any trace of  $P_i$  (Figure  
141 2B, Figure S2B, Movie S2C-D). This is in line with previous studies reporting that myosin-5  
142 and myosin-6 can distinguish the ADP- $P_i$  from the ADP state in phalloidin stabilized F-actin  
143 (Zimmermann et al., 2015). Considering our previous data indicating that the ABP coronin can  
144 sense the nucleotide state of F-actin via the D-loop conformation (Merino et al., 2018), we  
145 propose that myosin-5 and myosin-6 can read the age of F-actin in a similar manner by binding  
146 to the D-loop C-terminus interface (Gurel et al., 2017; S. F. Wulf et al., 2016).

147 At the moment, there is only one high-resolution cryo-EM structure of an actomyosin  
148 complex available that has been stabilized by phalloidin, namely the F-actin-myosin-1B  
149 complex (Mentes et al., 2018). In this structure, the D-loop is in the closed conformation and  
150 there is no density corresponding to  $P_i$ , suggesting that phalloidin was added to aged filaments  
151 after polymerization. However, it is not described when phalloidin was added in the original  
152 paper. Therefore, no conclusions can be drawn regarding the specific recognition of the D-loop  
153 state by myosin. In general, as already stated by others (Zimmermann et al., 2015), this  
154 illustrates the necessity for future publications to describe in detail how phalloidin is used.

155 The binding site and structure of phalloidin in both F-actin-PHD and F-actin-PHD-aged  
156 closely resemble the ones described for the F-actin-myosin-1B structure (Mentes et al., 2018)  
157 (Figure 3A-F, Movie S3A-D). Phalloidin binds to the interface of three actin subunits from both  
158 strands, thereby strengthening intra- and inter-strand contacts. The interaction is primarily  
159 mediated through hydrophobic interactions (Figure S3A-C) complemented by additional  
160 putative hydrogen bonds. It has been previously suggested that Asp179, Gly197, Ser199, and  
161 Glu205 contribute in hydrogen bonding to phalloidin (Mentes et al., 2018). In addition, our  
162 models indicate the presence of putative hydrogen bonds also between phalloidin and Glu72  
163 and Gln246. Interestingly, we found an extra density that likely corresponds to an ion bound to  
164 phalloidin in both maps (Figure 3B,E, Movie S3B,D). Although we cannot exclude calcium  
165 remaining from previous purification steps, the buffer composition suggests potassium and  
166 magnesium to be the primary candidates.

167

168 **Differences in the effect of JASP compared to phalloidin**

169 While the D-loop C-terminus interface adopts the closed conformation in the F-actin-PHD-  
170 aged structure, it is in the open state in our recent structure of F-actin-ADP copolymerized with  
171 JASP (Merino et al., 2018). To test whether this is due to the timepoint of addition of the  
172 respective toxin, we reconstituted F-actin-JASP in the same way as we have done with F-actin-  
173 PHD-aged, i.e. we added JASP after overnight ageing of F-actin (F-actin-JASP-aged). Using  
174 this approach and considering the similar properties of the toxins, we expected the filaments to  
175 be in the closed D-loop state with solely ADP in the nucleotide-binding pocket. However, the  
176 cryo-EM structure of F-actin-JASP-aged, which reached an average resolution of  $\sim 3.7 \text{ \AA}$   
177 (Figure S1, Table 2), differs significantly from our expectations.

178 First, the D-loop of F-actin-JASP-aged populates the open state to a large extent (weak  
179 density for the closed state, Figure 4A, Movie S1G-H), resembling our previous F-actin-ADP-  
180  $P_i$ -JASP structure (Merino et al., 2018). Second, the map includes strong density for  $P_i$  with an  
181 occupancy similar to ADP (Figure 5A, Movie S2G-H). This is surprising, since the  $P_i$  should  
182 be completely released similar to F-actin-PHD-aged (Figure 2B, Movie S2C-D). However, as  
183 for F-actin-PHD-aged, we did not remove the free  $P_i$  from the buffer but only reduced its  
184 concentration by pelleting the filaments and careful washing of the pellet for several times with  
185 phosphate-free buffer (see Methods). Therefore, the prominent difference regarding the  
186 presence of  $P_i$  in the nucleotide binding site suggests that JASP considerably increases the  
187 binding affinity of F-actin for  $P_i$  in comparison to phalloidin. This likely results in the remaining  
188 free  $P_i$  to be reincorporated into the active site.

189 To verify our results and to exclude the possibility of a  $P_i$  contamination of the used  
190 glassware, we repeated the reconstitution of F-actin-JASP-aged, taking extra measures to avoid  
191 impurities. The resulting cryo-EM structure, which is resolved to an average resolution of  $\sim 3.1$   
192  $\text{ \AA}$  (Figure S1, Table 2), has the same strong density for  $P_i$  (Figure 5B, Movie S2I-J). The  
193 position of the inorganic phosphate and the organization of the active site are the same in both  
194 of the F-actin-JASP-aged data sets and resemble the one of F-actin-ADP- $P_i$  (Figure S2D-E).  
195 The D-loop solely adopts the open conformation (Figure 4B, Movie S1I-J). We can therefore  
196 exclude that  $P_i$  impurities caused the strong  $P_i$  binding.

197 Taken together, the structure of F-actin-JASP-aged resembles our previous F-actin-  
198 ADP- $P_i$ -JASP structure (Merino et al., 2018) and differs considerably from that of F-actin-  
199 PHD-aged. We conclude that phalloidin and JASP do not share the same mode of action.  
200 Although we cannot exclude a more complex mechanism, it is most likely that JASP, in contrast  
201 to phalloidin, stabilizes the open D-loop state irrespective of the bound nucleotide or when it

202 was added. The higher  $P_i$  affinity in the case JASP might account for the stronger stabilizing  
203 effect of JASP on F-actin in comparison to phalloidin (Visegrády et al., 2005; 2004).

204

### 205 **Comparison of phalloidin and JASP binding to F-actin**

206 The structure and binding site of JASP is the same in all of our different cryo-EM structures of  
207 F-actin complexed with JASP (Merino et al., 2018; Pospich et al., 2017) (Figure 6, Movie S3G-  
208 J). Its binding site overlaps to a large proportion with the one of phalloidin, as illustrated by a  
209 superposition of structures (Figure S3D-F). The macro cycles of both molecules align well and  
210 stack onto the same hydrophobic patches on the actin surface. Furthermore, both molecules  
211 contain an indole group that occupies the same hydrophobic pocket. This indole group has been  
212 proposed to be of great importance for phalloidin binding (Mentes et al., 2018) and was shown  
213 to be essential for its toxicity (Falcigno et al., 2001; T. Wieland, 1977).

214 We have recently proposed that JASP inhibits  $P_i$  release by directly interacting with  
215 loops involved in phosphate release (Kabsch et al., 1990; Schulten and Wriggers, 1999) and by  
216 pushing SD1 toward the pointed end resulting in a stabilization of the open D-loop state (Merino  
217 et al., 2018). Despite the similarity of interactions of phalloidin and JASP with F-actin, we  
218 observe differences in the D-loop conformation between F-actin-PHD and F-actin-PHD-aged.  
219 Thus, the binding of phalloidin alone does not result in the open D-loop state by pushing SD1.  
220 Therefore, we propose that the interactions of phalloidin with loops near the active site are  
221 sufficient to explain the effects of the toxins.

222

### 223 **The structural effect of a fluorophore-conjugated phalloidin on F-actin**

224 Fluorophore-conjugated phalloidin is widely used for labeling F-actin in biochemical and  
225 cellular experiments (Melak et al., 2017). To explore its structural effect on actin filaments, we  
226 solved the cryo-EM structure of F-actin copolymerized with Alexa Fluor 546 phalloidin (F-  
227 actin-PHD-Alexa) at  $\sim 3.6$  Å (Figure S1, Table 1). The structure reveals that Alexa Fluor 546  
228 phalloidin binds to the same binding pocket as phalloidin with the fluorophore protruding from  
229 the filament (Figure 3G-I, Movie S3E-F). The Alexa 546 fluorophore is highly flexible and  
230 hence not resolved to a high resolution (Figure 3G). Its presence, however, becomes obvious  
231 when examining the map filtered to lower resolution (Figure 3I). Similar to F-actin-PHD, the  
232 active site contains ADP and at a lower occupancy  $P_i$  (Figure 2C, Movie S2C, Figure S2C). In  
233 contrast to F-actin-PHD, the density of the tip of the D-loop and the terminal part of the C-  
234 terminus are fragmented, suggesting a mixture of conformational states (Figure 1C, Movie S1E-  
235 F). The stem of the D-loop, however, indicates a higher population of the closed state in contrast



236 to the open D-loop state in F-actin-PHD. We therefore believe that the conjugated fluorophore  
237 results in slower binding of phalloidin to F-actin, allowing for the aging of a subset of actin  
238 subunits before Alexa Fluor 546 phalloidin can bind.

239

#### 240 **Conformational changes upon P<sub>i</sub> release**

241 The cryo-EM structures of F-actin-PHD and F-actin-PHD-aged represent the only pair of maps  
242 available where the open and the closed D-loop states are clearly linked to P<sub>i</sub> binding. To  
243 identify conformational changes upon P<sub>i</sub> release at the nucleotide binding site and how they are  
244 interconnected to the structural reorganization at the periphery of the filament, we compared  
245 the two structures. However, since the resolution of the available F-actin reconstructions is  
246 limited to ~ 3 - 4 Å (Pospich and Raunser, 2018), subtle differences are often not reflected in  
247 the corresponding atomic models. We therefore carried out a thorough comparison of the two  
248 density maps ([Movie S4](#)).

249 In absence of P<sub>i</sub>, Mg<sup>2+</sup> moves closer to the position previously occupied by P<sub>i</sub>. Moreover,  
250 both the phosphate binding loop 2 (residues 156-159) and the switch loop (residues 70-78)  
251 move towards the nucleotide, thereby partially closing the empty P<sub>i</sub> site ([Movie S4A-D](#)).  
252 Orchestrated with the other loops, phosphate binding loop 1 (residues 14-16) and the proline-  
253 rich loop (residues 108-112) also move slightly closer to the nucleotide ([Movie S4C,E](#)). The  
254 importance of both phosphate binding loops as well as the switch loop was already proposed  
255 early on based on crystal structures, mutations in yeast and molecular dynamics (MD)  
256 simulations of G-actin (Belmont et al., 1999b; Kabsch et al., 1990; Otterbein et al., 2001;  
257 Schulten and Wriggers, 1999; Wriggers and Schulten, 1997). The conformational change of the  
258 loops at the active site is coupled to the surrounding subdomains and eventually results in a  
259 considerable downward movement of SD1 and SD2 ([Movie S4F-H](#)). This movement in turn  
260 leads to a major conformational change of the D-loop and C-terminus (changing from open to  
261 closed D-loop state) ([Movie S4F-H](#)). This is in line with several previous studies, suggesting  
262 that P<sub>i</sub> release sets in motion a sequence of events resulting in a change of SD2 and structural  
263 rearrangement of the D-loop and C-terminus (Chou and Pollard, 2019; Graceffa and  
264 Dominguez, 2003; Otterbein et al., 2001; Saunders et al., 2014; Schulten and Wriggers, 1999;  
265 Zheng et al., 2007).

266 The organization of the D-loop C-terminus interface of F-actin (Ecken et al., 2015)  
267 suggests a cooperative transmission of this conformational change across neighboring subunits  
268 within one strand. In line with this, we observe a movement of SD3 that partially follows SD1  
269 ([Movie S4H](#)). SD3 is linked to the SD2 of the next subunit via the W-loop (residues 165-172),

270 which is thought to act as a nucleotide sensor (Kudryashov et al., 2010), primarily by Tyr169  
271 inserting into the D-loop by a lock-and-key interaction (Ecken et al., 2015).

272 Arg177 has been proposed to directly bind to  $P_i$  and shuttle it out of the active site,  
273 involving a large displacement of the residue (Schulten and Wriggers, 1999). However, Arg177  
274 is in the same position in both of our structures. This might be due to the binding of phalloidin,  
275 which is in close vicinity to Arg177. When mutated together with Arg179 to alanine, phalloidin  
276 does not bind to yeast F-actin anymore (Drubin et al., 1993), indicating that this residue is  
277 directly involved in phalloidin binding. In addition, phalloidin is in direct contact with both the  
278 switch and proline-rich loop (Figure 3, Movie S3A-F and Movie S4). Taken together, we  
279 therefore believe that the interaction of phalloidin with these specific loops and residues is the  
280 structural basis of the significant reduction of  $P_i$  release.

281

### 282 **States in stabilized filaments are representative for non-stabilized F-actin**

283 Rather than inducing artificial states, phalloidin and JASP probably trap conformations that  
284 occur during the natural aging process of F-actin. Thus, we believe that the structural changes  
285 that we observed in phalloidin-stabilized F-actin represent those in non-stabilized F-actin. To  
286 test this hypothesis, we performed a principle component (PC) analysis of atomic models and  
287 correlated structures of toxin-stabilized F-actin to structures of F-actin in different nucleotide  
288 states (Figure 7). The resulting distribution in the PC space indicates a close similarity of  
289 structural states and allows one to classify the conformational differences.

290 Models are arranged according to their D-loop state along the first PC, with the closed  
291 D-loop state at one end and the open D-loop state at the other. In line with this, the trajectory  
292 along the first PC (Movie S5) illustrates an upwards rotation of SD1 and SD2 and the  
293 reorganization of the D-loop and C-terminus, similar to what we have previously reported  
294 (Merino et al., 2018). The arrangement of atomic models along the second PC is less clear and  
295 does not display clearly separated clusters. The trajectory along this component (Movie S6)  
296 displays a rotation or torsion of SD1 and SD2 against SD3 and SD4, that we currently cannot  
297 connect to any characteristic of the mapped structures. In case of the third PC, models are  
298 arranged according to the occupancy of the inorganic phosphate site in the nucleotide binding  
299 pocket. Models with only ADP are located at one end, while F-actin-ADP- $P_i$ , which likely has  
300 the highest  $P_i$  occupancy, marks the other end. The trajectory along the third PC illustrates a  
301 breathing motion of the complete protomer, where the release of  $P_i$  results in a more compact  
302 structure (Movie S7).

303           The structural changes along the first and third PC reflect the rearrangements that we  
304 identified for phalloidin-stabilized filaments upon  $P_i$  release. The relative positions of our  
305 phalloidin F-actin structures - close to the ones complexed with ADP-BeF<sub>x</sub> and ADP,  
306 respectively - support our hypothesis that phalloidin does not induce artificial conformations  
307 but instead stabilizes states within the natural conformational space of F-actin (Figure 7). Thus,  
308 our findings with toxin-stabilized F-actin are probably representative for actin filaments in  
309 general.

310

### 311 **Conclusions**

312 In this study we demonstrate that the stabilizing agent phalloidin interferes with the natural  
313 aging process of F-actin, which is key to its cellular functions (Figure 8). Phalloidin traps  
314 different conformational states depending on when it is added to actin. Addition of phalloidin  
315 to actin immediately before polymerization results in the stabilization of the open D-loop state  
316 and the reduction of  $P_i$  release. However, when phalloidin is added to aged filaments that have  
317 already released  $P_i$ , it stabilizes the closed D-loop state. Thus, phalloidin cannot revert the  
318 conformational change associated with  $P_i$  release once it has taken place. While we found that  
319 the Alexa 546 fluorophore alters the effect of phalloidin on F-actin, it still affects the aging  
320 process of the filament. JASP also prevents F-actin from aging by trapping it in a young state  
321 and inhibiting  $P_i$  release, but it does not act precisely in the same way as phalloidin. Notably, it  
322 dramatically increases the affinity of F-actin for  $P_i$  (Figure 8). While cryo-EM structures are  
323 well suited to illustrate the effects of stabilizing toxins on the natural aging process of F-actin,  
324 they fail to shed light onto the underlying dynamic processes. Thus, to fully understand the  
325 mode of action of phalloidin and JASP, future TIRF microscopy experiments or binding assays  
326 similar to what was done for coronin, myosin 5 and myosin 6 (Cai et al., 2007; Merino et al.,  
327 2018; Zimmermann et al., 2015) should be conducted.

328           Our results have strong implications on the usage of both phalloidin and JASP for the  
329 stabilization and labeling of actin filaments in electron or fluorescent light microscopy. While  
330 it is known that both toxins affect actin dynamics, we demonstrate that binding of phalloidin  
331 and JASP interferes with the natural aging process of F-actin. This likely alters the interactions  
332 with ABPs, especially interactions with partners that sense the nucleotide state of actin to enable  
333 directed transport or remodeling of the cytoskeleton (Cai et al., 2007; Ge et al., 2014; Suarez et  
334 al., 2011; Zimmermann et al., 2015). While we do not know if some ABPs might be able to  
335 overwrite the effect of phalloidin and JASP, we believe that the toxins disrupt the balance within  
336 the complex actin cytoskeletal system.

337 Phalloidin is commonly used at substoichiometric concentrations for fluorescent  
338 labeling, thereby its full negative impact is possibly concealed. It is, however, difficult to assess  
339 the extent of the effect of phalloidin in a given experiment, especially when considering the  
340 proposed cooperative effect of phalloidin (Orlova et al., 1995; Visegrády et al., 2005). Because  
341 of the described possible disadvantages of phalloidin and JASP, we suggest that alternative  
342 labels are reconsidered, especially when investigating actin dynamics and protein interactions.  
343 There are many different labeling techniques available; based on either small molecules,  
344 peptides from ABPs, anti-actin-nanobodies or fusion constructs to a fluorescent protein or tag  
345 (for reviews see (Belin et al., 2014; Melak et al., 2017)).

346 Furthermore, our work illustrates that the stabilization of filaments likely does not result  
347 in artificial states but traps intermediate ones within the natural conformational space of F-actin.  
348 Thus, we believe that toxin-stabilized F-actin can be used to mimic a certain nucleotide state  
349 and that structural rearrangements observed in these filaments are representative for  
350 conformational changes of F-actin in general.

351

### 352 **Acknowledgements**

353 We thank O. Hofnagel and D. Prumbaum for assistance with data collection. We thank W.  
354 Linke and A. Unger (Ruhr-Universität Bochum, Germany) for providing us with muscle  
355 acetone powder. We thank H.-D. Arndt for providing us with jasplakinolide (Jasp-cLys). This  
356 work was supported by the Max Planck Society (to S.R.) and the European Council under the  
357 European Union's Seventh Framework Programme (FP7/ 2007–2013) (grant 615984) (to S.R.).  
358 S.P. was supported as a fellow of Studienstiftung des deutschen Volkes.

359

### 360 **Author contributions**

361

362 Conceptualization: S.P. and S.R. Investigation: S.P. and F.M. Formal analysis: S.P.  
363 Validation: S.P. and F.M. Visualization: S.P. Writing – Original Draft: S.P. Writing – Review  
364 & Editing: S.P., F.M. and S.R. Supervision and funding acquisition: S.R.

365

### 366 **Declaration of Interest**

367

368 The authors declare no competing interests.

369 **Figure legends**

370

371 **Figure 1. The intra-strand interfaces of phalloidin-stabilized F-actin.**

372 (A-C) Depiction of the intra-strand interfaces of (A) F-actin-PHD (shades of blue), (B) F-actin-  
373 PHD-aged (shades of green) and (C) F-actin-PHD-Alexa (shades of turquoise). While F-actin  
374 clearly adopts the open D-loop conformation in case of F-actin-PHD, the D-loop is fragmented  
375 and mixed for F-actin-PHD-Alexa and adopts a closed conformation accompanied by a helical-  
376 fold of the C-terminus in case of F-actin-PHD-aged. The tip of the D-loop and terminal part of  
377 the C-terminus of F-actin-PHD-Alexa were not included into the model due to the  
378 fragmentation of the density. Also see [Movie S1A-C](#).

379

380 **Figure 2. Nucleotides bound to phalloidin-stabilized F-actin.**

381 (A-C) Depiction of the central nucleotide binding cleft. Both F-actin-PHD and F-actin-PHD-  
382 Alexa have weak density for an inorganic phosphate ( $P_i$ , highlighted by a darker shade of  
383 orange) which was not fully released after ATP hydrolysis. Due to its weak density,  $P_i$  was not  
384 included into the atomic models. After aging of filaments, one cannot find density  
385 corresponding to  $P_i$  anymore. Nucleotides and phalloidin are colored in orange and yellow,  
386 respectively. Also see [Figure S2A-C](#) and [Movie S2A-C](#), for color-code see [Figure 1](#).

387

388 **Figure 3. The phalloidin binding site.**

389 (A-J) Central binding sites illustrating the interaction of phalloidin (yellow) with three subunits  
390 from both strands. Extra density, possibly corresponding to an ion (pink), is present in all three  
391 structures. The Alexa Flour 546 dye (violet) within the F-actin-PHD-Alexa structure is not  
392 visible in the sharpened map filtered to local resolution (G), but becomes visible in the  
393 unsharpened map filtered to 8 Å resolution (I), suggesting pronounced flexibility. The position  
394 where Alexa Flour 546 is linked to phalloidin is marked with asterisks in (H, I). Also see [Movie](#)  
395 [S3A-C](#) and [Figure S3](#), for color-code see [Figure 1](#).

396

397 **Figure 4. The intra-strand interfaces of JASP-stabilized F-actin.**

398 (A-B) Depiction of the central intra-strand interface made up by the D-loop and C-terminus of  
399 (A) F-actin-JASP-aged 1 (shades of purple) and (B) F-actin-JASP-aged 2 (shades of lavender).  
400 While F-actin-JASP-aged 2 solely adopts the open D-loop state, a smaller fraction of F-actin-  
401 JASP-aged 1 also populates the open D-loop state (extra density protruding from Q41; also see  
402 [Movie S1D-E](#); only the open conformation was modelled).

403

404 **Figure 5. Nucleotides bound to JASP-stabilized F-actin.**

405 (A-C) Depiction of the central nucleotide binding cleft of F-actin-JASP-aged. In contrast to the  
406 phalloidin-stabilized F-actin structures, both F-actin-JASP-aged structures have strong density  
407 for an inorganic phosphate (P<sub>i</sub>) (also see [Figure S2D-E](#) and [Movie S2D-E](#)). Nucleotides and  
408 JASP are colored in orange and yellow, respectively. For color-code see [Figure 4](#).

409

410 **Figure 6. The Jasplakinolide binding site.**

411 Central binding sites illustrating the interaction of JASP (yellow) with three subunits from both  
412 strands. Phalloidin and JASP share the same binding site as highlighted in [Figure S3D-F](#); also  
413 see [Movie S3D-E](#), for color-code see [Figure 4](#).

414

415 **Figure 7. Principle component analysis of atomic models of F-actin.**

416 Principle component analysis including phalloidin (shades of purple) and JASP-stabilized (light  
417 green) F-actin structures presented in this manuscript, F-actin bound to different nucleotide  
418 states, namely AMPPNP, ADP-BeFx, ADP-Pi and ADP (shades of blue) (Merino et al., 2018)  
419 and filaments stabilized by JASP, including JASP ADP-Pi and JASP ADP (shades of green)  
420 (Merino et al., 2018) – PDB accession numbers listed in methods. The percentage of the total  
421 variance attributed to each component is shown in the axis labels and summarized in the panel  
422 at the right bottom. Prominent clusters are highlighted by orange ellipsoids. Data points are  
423 labeled with abbreviations based on the bound nucleotide and/or stabilizing agent. Also see  
424 [Movies S5-S7](#).

425

426 **Figure 8. Schematic illustration of the effect of phalloidin and JASP on F-actin.**

427 (Top Panel) Summary of actin polymerization and filament aging highlighting associated  
428 structural states and their dependence on the bound nucleotide. (Bottom Panel) Depiction of  
429 the effect of phalloidin (left) and JASP (right) on F-actin as elucidated by cryo-EM  
430 reconstructions. While phalloidin and JASP have the same effect when added to G-actin-ATP  
431 before polymerization, their effect significantly differs when added after aging of filaments.

**Figure 1. The intra-strand interfaces of phalloidin-stabilized F-actin.**

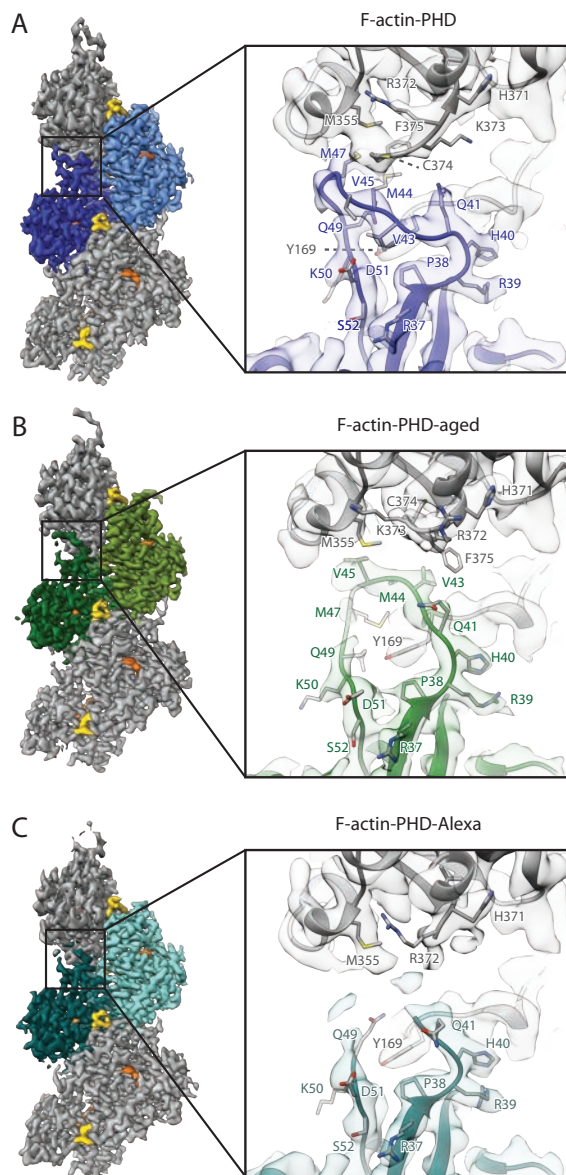

**Figure 2. Nucleotides bound to phalloidin-stabilized F-actin.**

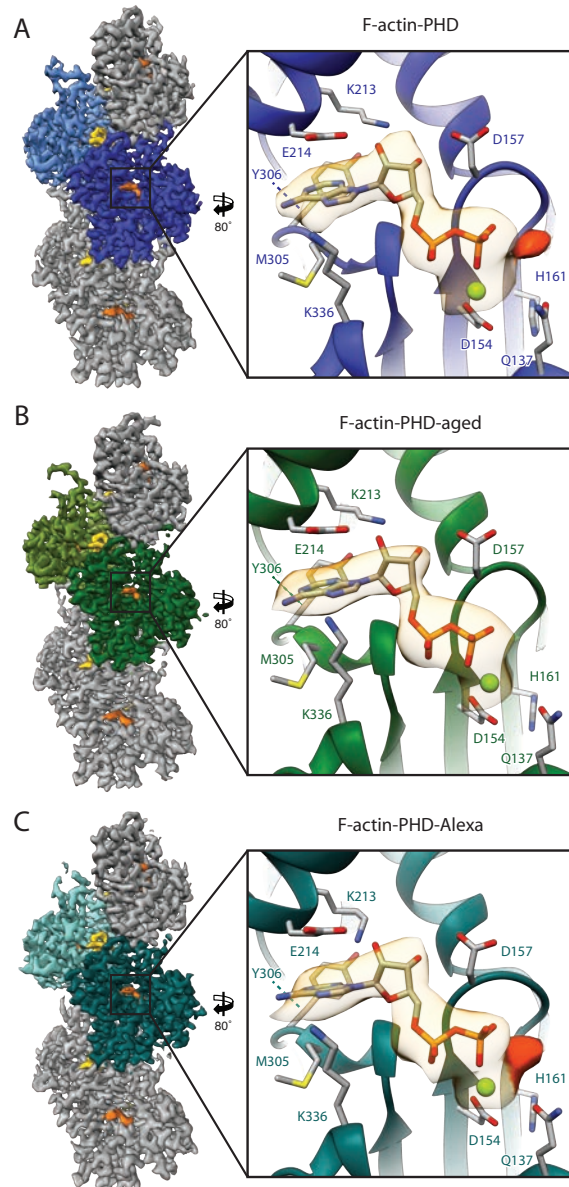

432

**Figure 3. The phalloidin binding site.**

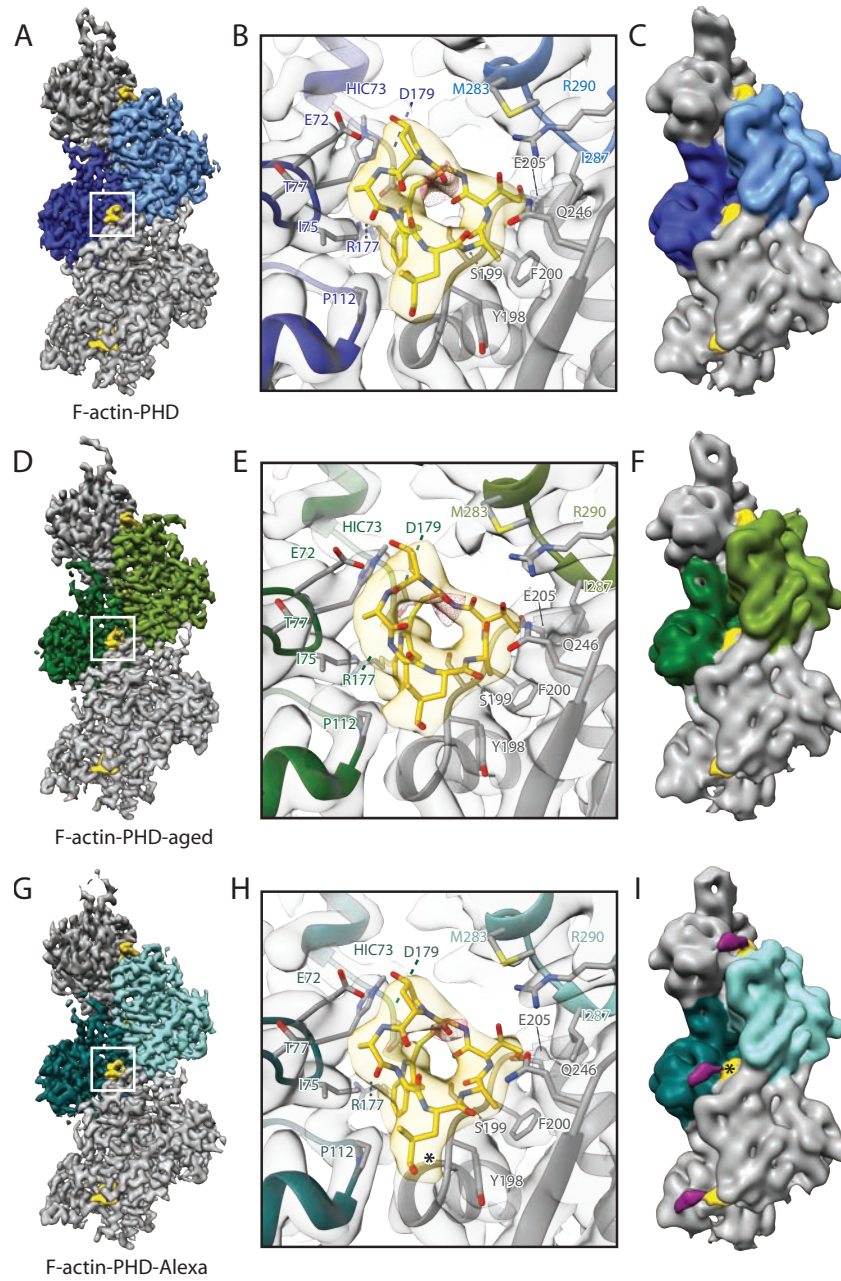



433

**Figure 4. The intra-strand interfaces of JASP-stabilized F-actin.**

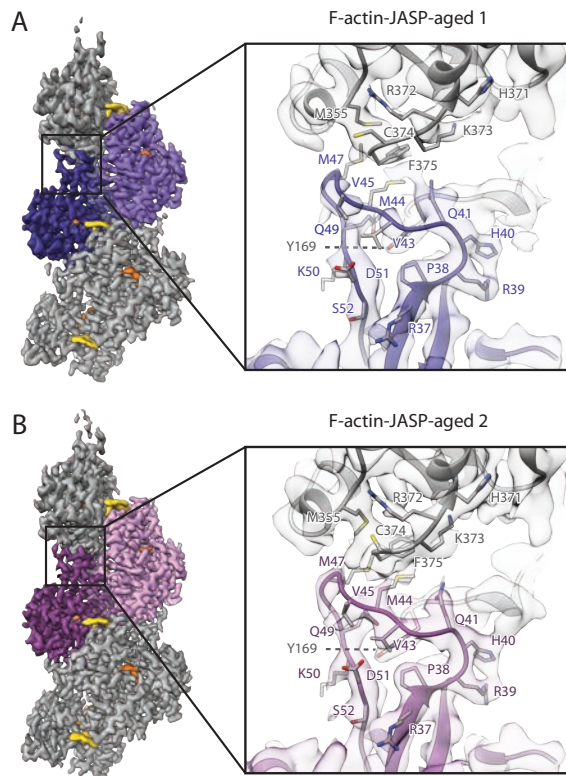

**Figure 5. Nucleotides bound to JASP-stabilized F-actin.**

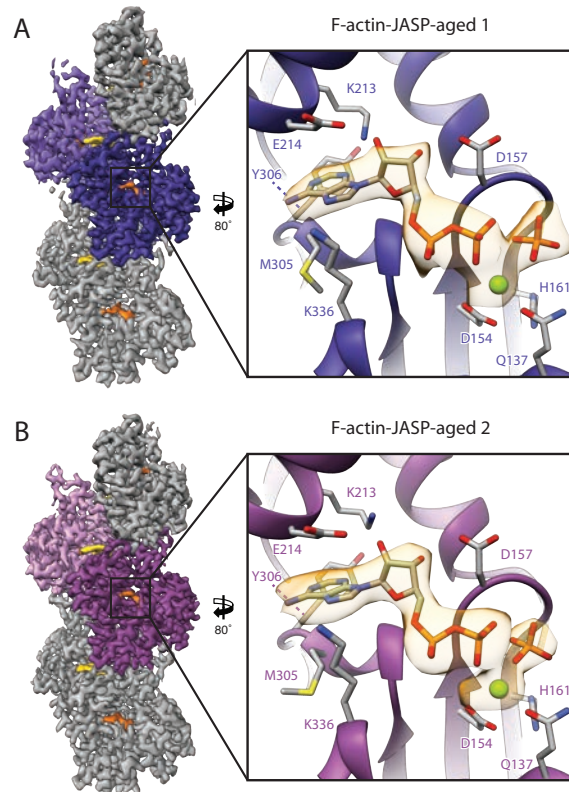

**Figure 6. The Jasplakinolide binding site.**

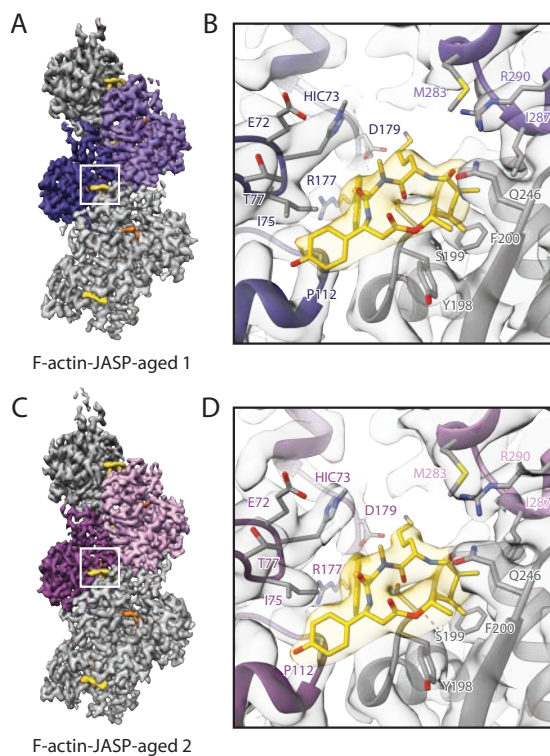

**Figure 7. Principle component analysis of atomic models of F-actin.**

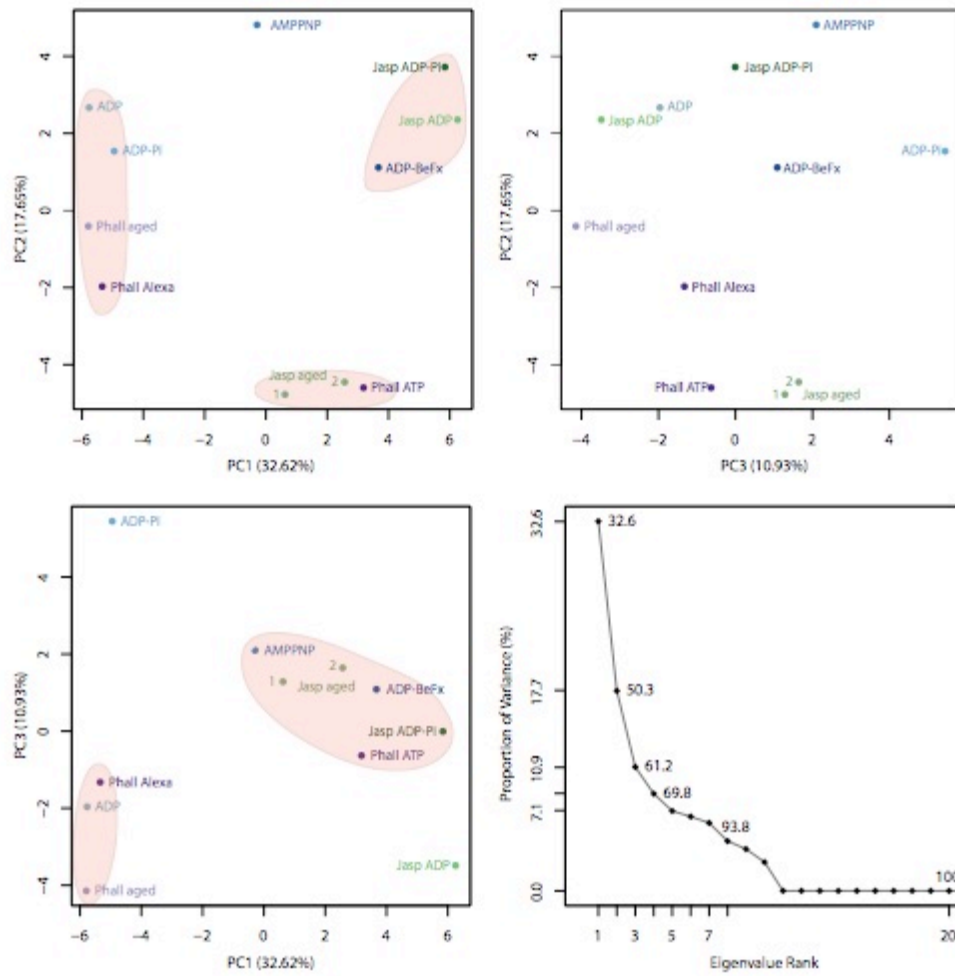

**Figure 8. Schematic illustration of the effect of phalloidin and JASP on F-actin.**

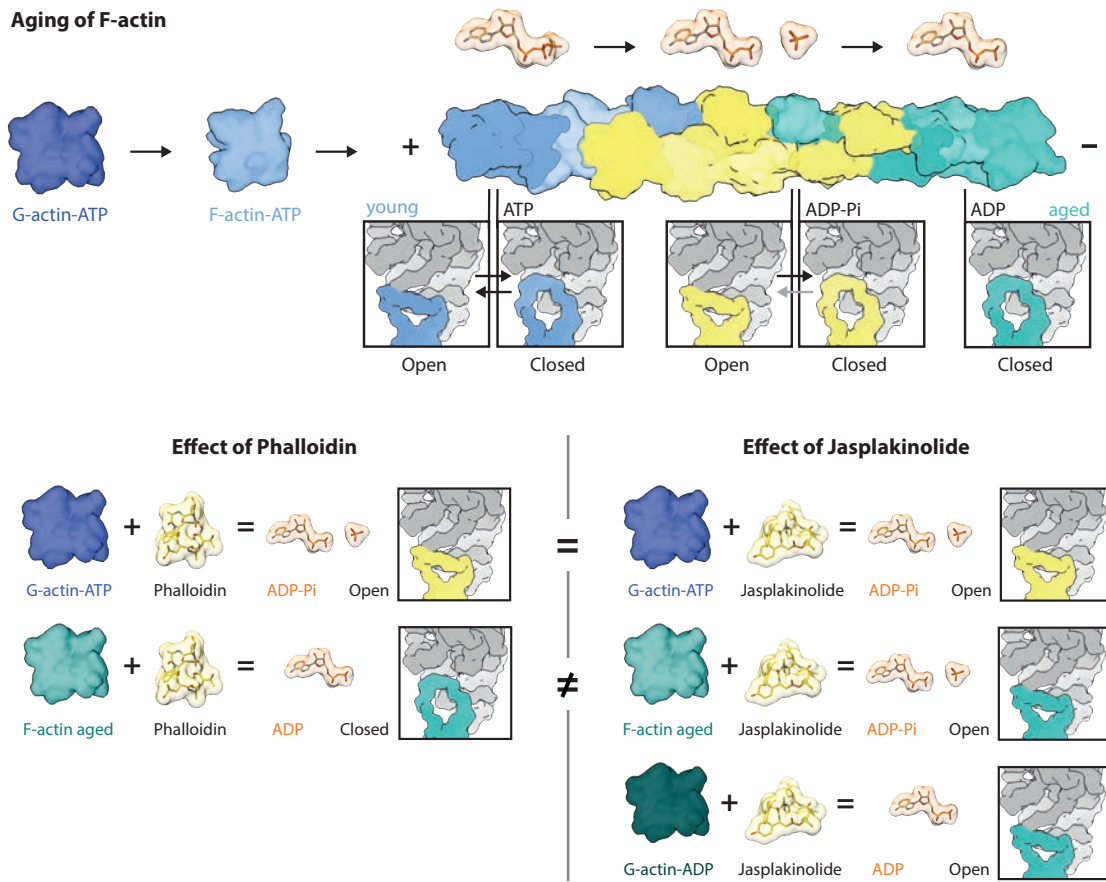

**Table 1.** Data collection, refinement, and model building statistics of phalloidin data sets

|                                                            | <b>F-actin-PHD</b>                | <b>F-actin-PHD-aged</b> | <b>F-actin-PHD-Alexa</b> |
|------------------------------------------------------------|-----------------------------------|-------------------------|--------------------------|
| <b>Microscopy</b>                                          |                                   |                         |                          |
| Microscope                                                 | Titan Krios (X-FEG, Cs-corrected) |                         |                          |
| Voltage [kV]                                               | 300                               |                         |                          |
| Defocus range [ $\mu\text{m}$ ]                            | 0.6 – 2.8                         | 0.7 – 2.8               | 0.4 – 2.6                |
| Camera                                                     | Falcon II linear                  | Falcon III linear       | Falcon III linear        |
| Pixel size [ $\text{\AA}$ ]                                | 1.14                              | 1.12                    | 1.12                     |
| Total electron dose [ $\text{e}/\text{\AA}^2$ ]            | 71                                | 87                      | 92                       |
| Exposure time [s]                                          | 2.1                               | 1.5                     | 1.5                      |
| Frames per movie                                           | 40                                | 35                      | 35                       |
| Number of images <sup>a</sup>                              | 2,041<br>(3,425)                  | 2,205<br>(5,213)        | 3,747<br>(5,221)         |
| <b>3-D refinement statistics</b>                           |                                   |                         |                          |
| Number of helical segments <sup>a</sup>                    | 405,264<br>(598,021)              | 513,783<br>(1,209,605)  | 719,053<br>(905,946)     |
| Electron dose final refinement [ $\text{e}/\text{\AA}^2$ ] | 14                                | 15                      | 16                       |
| Resolution [ $\text{\AA}$ ] <sup>b</sup>                   | 3.3                               | 3.7                     | 3.6                      |
| Map sharpening factor [ $\text{\AA}^2$ ]                   | -86                               | -128                    | -126                     |
| <b>Measured helical symmetry<sup>c</sup></b>               |                                   |                         |                          |
| Rise [ $\text{\AA}$ ]                                      | 27.59 $\pm$ 0.02                  | 27.56 $\pm$ 0.03        | 27.53 $\pm$ 0.02         |
| Helical twist [ $^\circ$ ]                                 | 166.9 $\pm$ 0.1                   | 166.9 $\pm$ 0.1         | 166.9 $\pm$ 0.1          |
| <b>Atomic model statistics</b>                             |                                   |                         |                          |
| Non-hydrogen atoms                                         | 14,915                            | 14,915                  | 14,590                   |
| Rosetta FSC-Work/FSC-Free                                  | 0.574/0.565                       | 0.586/0.584             | 0.583/0.582              |
| Molprobity score                                           | 1.37                              | 1.54                    | 1.26                     |
| Clashscore                                                 | 2.32                              | 4.70                    | 3.66                     |
| EMRinger score                                             | 3.37                              | 2.85                    | 2.96                     |
| Bond RMSD [ $\text{\AA}$ ]                                 | 0.017                             | 0.018                   | 0.018                    |
| Angle RMSD [ $^\circ$ ]                                    | 1.42                              | 1.48                    | 1.43                     |
| Poor rotamers [%]                                          | 0                                 | 0                       | 0                        |
| Favored rotamers [%]                                       | 100                               | 100                     | 100                      |
| Ramachandran favored [%]                                   | 94.85                             | 95.66                   | 97.49                    |
| Ramachandran outliers [%]                                  | 0.00                              | 0.00                    | 0.00                     |

<sup>a</sup>In parenthesis is the initial number of images or segments.

<sup>b</sup>The resolution corresponds to a section of  $\sim 120 \text{ \AA}$  at the center of the filaments

<sup>c</sup>The helical parameters were estimated from the atomic model of five consecutive subunits independently fitted to the map as described before (Pospich et al., 2017). The small variations on the helical rise are within the margin of error of the pixel size determination. Therefore, the differences between reconstructions from different detectors could be due to technical differences.

**Table 2.** Data collection, refinement, and model building statistics of JASP data sets

|                                                     | F-actin-JASP-aged 1               | F-actin-JASP-aged 2            |
|-----------------------------------------------------|-----------------------------------|--------------------------------|
| <b>Microscopy</b>                                   |                                   |                                |
| Microscope                                          | Titan Krios (X-FEG, Cs-corrected) | Titan Krios (X-FEG, Cs 2.7 mm) |
| Voltage [kV]                                        | 300                               | 300                            |
| Defocus range [ $\mu\text{m}$ ]                     | 1.0 – 3.0                         | 0.5 – 3.0                      |
| Camera                                              | Falcon III linear                 | K2 super-resolution            |
| Pixel size [ $\text{\AA}$ ]                         | 1.12                              | 0.525 / 1.05 <sup>a</sup>      |
| Total electron dose [ $e/\text{\AA}^2$ ]            | 88                                | 78                             |
| Exposure time [s]                                   | 2.1                               | 15                             |
| Frames per movie                                    | 35                                | 40                             |
| Number of images <sup>b</sup>                       | 4,314<br>(5,335)                  | 1,994<br>(2,856)               |
| <b>3-D refinement statistics</b>                    |                                   |                                |
| Number of helical segments <sup>b</sup>             | 352,285<br>(1,237,583)            | 336,783<br>(467,060)           |
| Electron dose final refinement [ $e/\text{\AA}^2$ ] | 15                                | Polished particles             |
| Resolution [ $\text{\AA}$ ] <sup>c</sup>            | 3.7                               | 3.1                            |
| Map sharpening factor [ $\text{\AA}^2$ ]            | -116                              | -48                            |
| <b>Measured helical symmetry<sup>d</sup></b>        |                                   |                                |
| Rise [ $\text{\AA}$ ]                               | 27.61 $\pm$ 0.02                  | 27.67 $\pm$ 0.02               |
| Helical twist [ $^\circ$ ]                          | 166.8 $\pm$ 0.1                   | 166.7 $\pm$ 0.1                |
| <b>Atomic model statistics</b>                      |                                   |                                |
| Non-hydrogen atoms                                  | 14,910                            | 14,910                         |
| Rosetta FSC-Work/FSC-Free                           | 0.598/0.598                       | 0.622/0.623                    |
| Molprobity score                                    | 1.06                              | 0.97                           |
| Clashscore                                          | 2.69                              | 2.05                           |
| EMRinger score                                      | 2.80                              | 3.58                           |
| Bond RMSD [ $\text{\AA}$ ]                          | 0.037                             | 0.035                          |
| Angle RMSD [ $^\circ$ ]                             | 1.70                              | 1.71                           |
| Poor rotamers [%]                                   | 0                                 | 0                              |
| Favored rotamers [%]                                | 100                               | 100                            |
| Ramachandran favored [%]                            | 99.46                             | 99.19                          |
| Ramachandran outliers [%]                           | 0.00                              | 0.00                           |

<sup>a</sup> Pixel size after 2x binning used for processing

<sup>b</sup> In parenthesis is the initial number of images or segments.

<sup>c</sup> The resolution corresponds to a section of  $\sim 120 \text{\AA}$  at the center of the filaments

<sup>d</sup> The helical parameters were estimated from the atomic model of five consecutive subunits independently fitted to the map as described before (Pospich et al., 2017). The small variations on the helical rise are within the margin of error of the pixel size determination. Therefore, the differences between reconstructions from different detectors could be due to technical differences.

## References

- Anderl, J., Echner, H., Faulstich, H., 2012. Chemical modification allows phallotoxins and amatoxins to be used as tools in cell biology. *Beilstein J Org Chem* 8, 2072–2084. doi:10.3762/bjoc.8.233
- Barden, J.A., Miki, M., Hambly, B.D., Remedios, Dos, C.G., 1987. Localization of the phalloidin and nucleotide-binding sites on actin. *Eur. J. Biochem.* 162, 583–588.
- Belin, B.J., Goins, L.M., Mullins, R.D., 2014. Comparative analysis of tools for live cell imaging of actin network architecture. *Bioarchitecture* 4, 189–202. doi:10.1080/19490992.2014.1047714
- Belmont, L.D., Orlova, A., Drubin, D.G., Egelman, E.H., 1999a. A change in actin conformation associated with filament instability after Pi release. *Proc. Natl. Acad. Sci. U.S.A.* 96, 29–34.
- Belmont, L.D., Patterson, G.M., Drubin, D.G., 1999b. New actin mutants allow further characterization of the nucleotide binding cleft and drug binding sites. *J. Cell. Sci.* 112 ( Pt 9), 1325–1336.
- Blanchoin, L., Pollard, T.D., 2002. Hydrolysis of ATP by polymerized actin depends on the bound divalent cation but not profilin. *Biochemistry* 41, 597–602. doi:10.1021/bi011214b
- Bubb, M.R., Senderowicz, A.M., Sausville, E.A., Duncan, K.L., Korn, E.D., 1994. Jasplakinolide, a cytotoxic natural product, induces actin polymerization and competitively inhibits the binding of phalloidin to F-actin. *J. Biol. Chem.* 269, 14869–14871.
- Bubb, M.R., Spector, I., Beyer, B.B., Fosen, K.M., 2000. Effects of jasplakinolide on the kinetics of actin polymerization. An explanation for certain in vivo observations. *J. Biol. Chem.* 275, 5163–5170.
- Cai, L., Makhov, A.M., Bear, J.E., 2007. F-actin binding is essential for coronin 1B function in vivo. *J. Cell. Sci.* 120, 1779–1790. doi:10.1242/jcs.007641
- Carlier, M.F., Pantaloni, D., 1986. Direct evidence for ADP-inorganic phosphate-F-actin as the major intermediate in ATP-actin polymerization. Rate of dissociation of inorganic phosphate from actin filaments. *Biochemistry* 25, 7789–7792. doi:10.1021/bi00372a001
- Chou, S.Z., Pollard, T.D., 2019. Mechanism of actin polymerization revealed by cryo-EM structures of actin filaments with three different bound nucleotides. *Proc. Natl. Acad. Sci. U.S.A.* 519, 201807028. doi:10.1073/pnas.1807028115
- Crews, P., Manes, L.V., Boehler, M., 1986. Jasplakinolide, a cyclodepsipeptide from the marine sponge, SP. *Tetrahedron Letters* 27, 2797–2800. doi:10.1016/S0040-4039(00)84645-6
- Dancker, P., Hess, L., 1990. Phalloidin reduces the release of inorganic phosphate during actin polymerization. *Biochim. Biophys. Acta* 1035, 197–200.
- Dancker, P., Löw, I., Hasselbach, W., Wieland, T., 1975. Interaction of actin with phalloidin: polymerization and stabilization of F-actin. *Biochim. Biophys. Acta* 400, 407–414.
- Drubin, D.G., Jones, H.D., Wertman, K.F., 1993. Actin structure and function: roles in mitochondrial organization and morphogenesis in budding yeast and identification of the phalloidin-binding site. *Mol. Biol. Cell* 4, 1277–1294.
- Estes, J.E., Selden, L.A., Gershman, L.C., 1981. Mechanism of action of phalloidin on the polymerization of muscle actin. *Biochemistry* 20, 708–712.
- Falcigno, L., Costantini, S., D'Auria, G., Bruno, B.M., Zobeley, S., Zanotti, G., Paolillo, L., 2001. Phalloidin synthetic analogues: structural requirements in the interaction with F-actin. *Chemistry* 7, 4665–4673.
- Ge, P., Durer, Z.A.O., Kudryashov, D., Zhou, Z.H., Reisler, E., 2014. Cryo-EM reveals different coronin binding modes for ADP- and ADP-BeFx actin filaments. *Nat. Struct. Mol. Biol.* 21, 1075–1081. doi:10.1038/nsmb.2907

- Graceffa, P., Dominguez, R., 2003. Crystal structure of monomeric actin in the ATP state. Structural basis of nucleotide-dependent actin dynamics. *Journal of Biological Chemistry* 278, 34172–34180. doi:10.1074/jbc.M303689200
- Gurel, P.S., Kim, L.Y., Ruijgrok, P.V., Omabegho, T., Bryant, Z., Alushin, G.M., 2017. Cryo-EM structures reveal specialization at the myosin VI-actin interface and a mechanism of force sensitivity. *Elife* 6, e31125. doi:10.7554/eLife.31125
- Holmes, K.C., Popp, D., Gebhard, W., Kabsch, W., 1990. Atomic model of the actin filament. *Nature* 347, 44–49. doi:10.1038/347044a0
- Holzinger, A., 2009. Jasplakinolide: an actin-specific reagent that promotes actin polymerization. *Methods Mol. Biol.* 586, 71–87. doi:10.1007/978-1-60761-376-3\_4
- Iwamoto, D.V., Huehn, A., Simon, B., Huet-Calderwood, C., Baldassarre, M., Sindelar, C.V., Calderwood, D.A., 2018. Structural basis of the filamin A actin-binding domain interaction with F-actin. *Nat. Struct. Mol. Biol.* 8, 575–927. doi:10.1038/s41594-018-0128-3
- Kabsch, W., Mannherz, H.G., Suck, D., Pai, E.F., Holmes, K.C., 1990. Atomic structure of the actin:DNase I complex. *Nature* 347, 37–44. doi:10.1038/347037a0
- Kudryashov, D.S., Grintsevich, E.E., Rubenstein, P.A., Reisler, E., 2010. A nucleotide state-sensing region on actin. *J. Biol. Chem.* 285, 25591–25601. doi:10.1074/jbc.M110.123869
- Lengsfeld, A.M., Löw, I., Wieland, T., Dancker, P., Hasselbach, W., 1974. Interaction of phalloidin with actin. *Proc. Natl. Acad. Sci. U.S.A.* 71, 2803–2807.
- Lorenz, M., Popp, D., Holmes, K.C., 1993. Refinement of the F-actin model against X-ray fiber diffraction data by the use of a directed mutation algorithm. *J Mol Biol* 234, 826–836. doi:10.1006/jmbi.1993.1628
- Lukinavičius, G., Reymond, L., D'Este, E., Masharina, A., Göttfert, F., Ta, H., Güther, A., Fournier, M., Rizzo, S., Waldmann, H., Blaukopf, C., Sommer, C., Gerlich, D.W., Arndt, H.-D., Hell, S.W., Johnsson, K., 2014. Fluorogenic probes for live-cell imaging of the cytoskeleton. *Nat. Methods* 11, 731–733. doi:10.1038/nmeth.2972
- Lynen, F., Wieland, U., 1938. Über die Giftstoffe des Knollenblätterpilzes. IV. *Justus Liebig's Annalen der Chemie* 533, 93–117. doi:10.1002/jlac.19385330105
- Melak, M., Plessner, M., Grosse, R., 2017. Actin visualization at a glance. *J. Cell. Sci.* 130, 525–530. doi:10.1242/jcs.189068
- Mentes, A., Huehn, A., Liu, X., Zwolak, A., Dominguez, R., Shuman, H., Ostap, E.M., Sindelar, C.V., 2018. High-resolution cryo-EM structures of actin-bound myosin states reveal the mechanism of myosin force sensing. *Proc. Natl. Acad. Sci. U.S.A.* 110, 201718316. doi:10.1073/pnas.1718316115
- Merino, F., Pospich, S., Funk, J., Wagner, T., Küllmer, F., Arndt, H.-D., Bieling, P., Raunser, S., 2018. Structural transitions of F-actin upon ATP hydrolysis at near-atomic resolution revealed by cryo-EM. *Nat. Struct. Mol. Biol.* 25, 528–537. doi:10.1038/s41594-018-0074-0
- Oda, T., Iwasa, M., Aihara, T., Maéda, Y., Narita, A., 2009. The nature of the globular- to fibrous-actin transition. *Nature* 457, 441–445. doi:10.1038/nature07685
- Oda, T., Namba, K., Maéda, Y., 2005. Position and orientation of phalloidin in F-actin determined by X-ray fiber diffraction analysis. *Biophys. J.* 88, 2727–2736. doi:10.1529/biophysj.104.047753
- Orlova, A., Prochniewicz, E., Egelman, E.H., 1995. Structural dynamics of F-actin: II. Cooperativity in structural transitions. *J Mol Biol* 245, 598–607. doi:10.1006/jmbi.1994.0049
- Otterbein, L.R., Graceffa, P., Dominguez, R., 2001. The crystal structure of uncomplexed actin in the ADP state. *Science* 293, 708–711. doi:10.1126/science.1059700
- Pollard, T.D., 1986. Rate Constants for the Reactions of ATP- and ADP-Actin with the Ends of Actin Filaments 103, 2747–2754.

- Pollard, T.D., Cooper, J.A., 2009. Actin, a central player in cell shape and movement. *Science* 326, 1208–1212. doi:10.1126/science.1175862
- Pospich, S., Kumpula, E.-P., Ecken, von der, J., Vahokoski, J., Kursula, I., Raunser, S., 2017. Near-atomic structure of jasplakinolide-stabilized malaria parasite F-actin reveals the structural basis of filament instability. *Proc. Natl. Acad. Sci. U.S.A.* II, 201707506. doi:10.1073/pnas.1707506114
- Pospich, S., Raunser, S., 2018. Single particle cryo-EM—an optimal tool to study cytoskeletal proteins. *Curr. Opin. Struct. Biol.* 52, 16–24. doi:10.1016/j.sbi.2018.07.006
- Saunders, M.G., Tempkin, J., Weare, J., Dinner, A.R., Roux, B., Voth, G.A., 2014. Nucleotide regulation of the structure and dynamics of G-actin. *Biophys. J.* 106, 1710–1720. doi:10.1016/j.bpj.2014.03.012
- Schulten, K., Wriggers, W., 1999. Investigating a Back Door Mechanism of Actin Phosphate Release by Steered Molecular Dynamics 1–12.
- Steinmetz, M.O., Stoffler, D., Müller, S.A., Jahn, W., Wolpensinger, B., Goldie, K.N., Engel, A., Faulstich, H., Aebi, U., 1998. Evaluating atomic models of F-actin with an undecagold-tagged phalloidin derivative. *J Mol Biol* 276, 1–6. doi:10.1006/jmbi.1997.1529
- Suarez, C., Roland, J., Boujemaa-Paterski, R., Kang, H., McCullough, B.R., Reymann, A.-C., Guérin, C., Martiel, J.-L., La Cruz, De, E.M., Blanchoin, L., 2011. Cofilin tunes the nucleotide state of actin filaments and severs at bare and decorated segment boundaries. *Curr. Biol.* 21, 862–868. doi:10.1016/j.cub.2011.03.064
- Terracciano, S., Bruno, I., Bifulco, G., Avallone, E., Smith, C.D., Gomez-Paloma, L., Riccio, R., 2005. Synthesis, solution structure, and bioactivity of six new simplified analogues of the natural cyclodepsipeptide jaspamide. *Bioorg. Med. Chem.* 13, 5225–5239. doi:10.1016/j.bmc.2005.05.042
- Vig, A., Ohmacht, R., Jámbo, É., Bugyi, B., Nyitrai, M., Hild, G., 2011. The effect of toxins on inorganic phosphate release during actin polymerization. *Eur. Biophys. J.* 40, 619–626. doi:10.1007/s00249-010-0659-y
- Visegrády, B., Lorinczy, D., Hild, G., Somogyi, B., Nyitrai, M., 2005. A simple model for the cooperative stabilisation of actin filaments by phalloidin and jasplakinolide. *FEBS Lett.* 579, 6–10. doi:10.1016/j.febslet.2004.11.023
- Visegrády, B., Lorinczy, D., Hild, G., Somogyi, B., Nyitrai, M., 2004. The effect of phalloidin and jasplakinolide on the flexibility and thermal stability of actin filaments. *FEBS Lett.* 565, 163–166. doi:10.1016/j.febslet.2004.03.096
- von der Ecken, J., Müller, M., Lehman, W., Manstein, D.J., Penczek, P.A., Raunser, S., 2015. Structure of the F-actin--tropomyosin complex. *Nature* 519, 114–117. doi:10.1038/nature14033
- Wieland, T., 1977. Modification of actins by phallotoxins. *Naturwissenschaften* 64, 303–309.
- Wieland, T., Govindan, V.M., 1974. Phallotoxins bind to actins. *FEBS Lett.* 46, 351–353. doi:10.1016/0014-5793(74)80404-7
- Wriggers, W., Schulten, K., 1997. Stability and dynamics of G-actin: back-door water diffusion and behavior of a subdomain 3/4 loop. *Biophys. J.* 73, 624–639. doi:10.1016/S0006-3495(97)78098-6
- Wulf, E., Deboben, A., Bautz, F.A., Faulstich, H., Wieland, T., 1979. Fluorescent phalloxin, a tool for the visualization of cellular actin. *Proc. Natl. Acad. Sci. U.S.A.* 76, 4498–4502. doi:10.1073/pnas.76.9.4498
- Wulf, S.F., Ropars, V., Fujita-Becker, S., Oster, M., Hofhaus, G., Trabuco, L.G., Pylypenko, O., Sweeney, H.L., Houdusse, A.M., Schröder, R.R., 2016. Force-producing ADP state of myosin bound to actin. *Proc. Natl. Acad. Sci. U.S.A.* 113, E1844–52. doi:10.1073/pnas.1516598113



- Yao, G., Joswig, J.-O., Keller, B.G., Süssmuth, R.D., 2019. Total Synthesis of the Death Cap Toxin Phalloidin: Atropoisomer Selectivity Explained by Molecular-Dynamics Simulations. *Chemistry* 25, 8030–8034. doi:10.1002/chem.201901888
- Zheng, X., Diraviyam, K., Sept, D., 2007. Nucleotide effects on the structure and dynamics of actin. *Biophys. J.* 93, 1277–1283. doi:10.1529/biophysj.107.109215
- Zimmermann, D., Santos, A., Kovar, D.R., Rock, R.S., 2015. Actin age orchestrates myosin-5 and myosin-6 run lengths. *Curr. Biol.* 25, 2057–2062. doi:10.1016/j.cub.2015.06.033

## 434 **Materials and Methods**

435

### 436 **Protein purification and sample preparation**

437 Actin was purified from rabbit skeletal muscle acetone powder using several polymerization  
438 and depolymerization steps as described previously (Merino et al., 2018; Pardee and Spudich,  
439 1982). Purified G-actin was stored in G-actin buffer (5 mM Tris pH 7.5, 1mM DTT, 0.2 mM  
440 CaCl<sub>2</sub>, 2mM NaN<sub>3</sub> and 0.5 mM ATP) at -80 °C. Aliquots were freshly thawed and cleared  
441 through centrifugation, before polymerization was induced by adding 100 mM KCl, 2mM  
442 MgCl<sub>2</sub> and 0.5 mM ATP. An additional cycle of depolymerization/polymerization was  
443 performed for F-actin-PHD and F-actin-PHD-Alexa samples. Phalloidin (Sigma Aldrich),  
444 phalloidin Alexa Flour 546 (Thermo Fischer) and jasplakinolide (JASP, see (Merino et al.,  
445 2018) for details) were solved in methanol and DMSO, respectively, producing a 2-3 mM stock  
446 solution. For F-actin-PHD and F-actin-PHD-Alexa samples a ~ 2-fold molar excess of ligand  
447 was added directly before induction of the polymerization. After overnight polymerization  
448 filaments were collected through ultracentrifugation and pellets were rinsed and resuspended  
449 in F-buffer (5 mM Tris pH 7.5, 1 mM DTT, 100 mM KCl, 2mM MgCl<sub>2</sub> and 2mM NaN<sub>3</sub>) with  
450 additional small amounts of phalloidin and phalloidin Alexa Flour 546, respectively, to avoid  
451 falling below K<sub>D</sub>. Aged samples (F-actin-PHD-aged, F-actin-JASP-aged) were polymerized  
452 overnight in absence of any stabilizing small molecule to ensure complete hydrolysis of ATP.  
453 Finally, phalloidin or JASP were added in ~ 2-fold molar excess after multiple rounds of careful  
454 rinsing (with F-actin buffer to reduce amount of P<sub>i</sub>) and resuspension of the pellet in F-actin  
455 buffer. Note that the two F-actin-JASP-aged data sets are replicates that were prepared  
456 independently. Additional 0.2 mM ADP and 0.02 v/w% Tween 20 were added to F-actin-  
457 JASP-aged samples.

458

### 459 **Cryo-EM grid preparation and screening**

460 An initial sample check and adjustment of the protein concentration was performed for all  
461 samples except F-actin-PHD-aged and F-actin-JASP-aged 2 using a standard negative staining  
462 protocol described before (Ecken et al., 2015). Screening was performed on a Tecnai G Spirit  
463 microscope (FEI Thermo Fisher) operated at 120 kV and equipped with a LaB<sub>6</sub> cathode and a  
464 CMOS TemCam F416 (TVIPS) camera. After initial screening of the F-actin-PHD sample,  
465 filaments were spun down and stored as a pellet at 4°C for ~ 2 weeks. After resuspension and  
466 addition of supplementary phalloidin to ensure saturation, filaments were screened again and  
467 found to be indistinguishable from those seen in the first screening.

468 For cryo grid preparation 0.02-0.03 v/w% of Tween 20 were added to all samples if not  
469 yet done before. All samples were diluted in F-buffer without additional nucleotide or  
470 stabilizing small molecule resulting in the following final protein and methanol/DMSO  
471 concentrations; F-actin-PHD ~ 0.2  $\mu$ M, 0.01%, F-actin-PHD-Alexa ~ 8.4  $\mu$ M, 1.48%, F-actin-  
472 PHD-aged ~ 5  $\mu$ M, 2.0%, F-actin-JASP-aged 1 ~ 7.5  $\mu$ M, 0.5 % and F-actin-JASP-aged 2 ~ 5  
473  $\mu$ M, 0.2 %. Values are estimates based on the initial, spectrophotometrically determined  
474 concentrations.

475 In case of F-actin-PHD, 1.5  $\mu$ l sample were incubated for 30 s on a previously glow  
476 discharged holey carbon grid (QF R2/1 300 mesh, Quantifoil) and manually backside blotted  
477 for 9s using Whatman no. 5 filter paper. Grids were then directly plunged into liquid ethane  
478 using a CP3 cryo plunger (Gatan) at ~ 98 % humidity. All other samples were blotted and  
479 plunged automatically using a Vitrobot cryo plunger (FEI Thermo Fischer) operated at 13 °C  
480 and 100% humidity. 1.5 - 3  $\mu$ l of sample were applied onto a previously glow discharged holey  
481 carbon grid (QF R2/1 300 mesh, Quantifoil) and directly blotted for 6.5 - 9.0 s using a blotting  
482 force of -20 or -25. After a drain time of 0 - 1s grids were automatically plunge frozen into  
483 liquid ethane. Prescreening and cryo sample optimization was performed either on a Tecnai G  
484 Spirit microscope (FEI Thermo Fisher) operated at 120 kV using a single-tilt cryotransfer  
485 holder 626 (Gatan) or on a Talos Arctica (FEI Thermo Fisher) operated at 200 kV and equipped  
486 with a Falcon III direct detector (FEI Thermo Fisher).

487

### 488 **Cryo-EM data acquisition**

489 Data sets were collected on Titan Krios microscopes (FEI Thermo Fisher) operated at 300 kV  
490 and equipped with a X-FEG using EPU. Equally dosed frames were collected using Falcon II,  
491 Falcon III (linear mode, FEI Thermo Fisher) or K2 Summit (super-resolution mode, Gatan)  
492 direct electron detectors, the latter in combination with a GIF quantum-energy filter set to a  
493 filter width of 15 eV . For every hole four images with carbon edge were collected. Acquisition  
494 details of all five data sets including pixel size, electron dose, exposure time, number of frames  
495 and defocus range are summarized in [Table 1](#) and [Table 2](#). Data collection was monitored live  
496 using TranSphire (Stabrin, 2018), allowing for direct adjustments of data acquisition settings  
497 when necessary i.e. defocus range or astigmatism. The total number of images collected is  
498 summarized in in [Table 1](#) and [Table 2](#).

499

### 500 **Image processing of cryo-EM data sets**

501 Collected movies were automatically and on-the-fly preprocessed using TranSphire (Stabrin,  
502 2018). Preprocessing included drift correction with MotionCor2 (Zheng et al., 2017) creating  
503 aligned full-dose and dose-weighted micrographs. In this step the JASP aged 2 super-resolution  
504 images were furthermore binned twice. For all other data sets additional aligned micrographs  
505 with a total dose of  $\sim 25 \text{ e}/\text{\AA}^2$  and  $\sim 15 \text{ e}/\text{\AA}^2$  were generated. CTF estimation was also performed  
506 within TranSphire; running either CTFFIND4.1.5 or GCTF (only for F-actin-PHD-Alexa and  
507 F-actin-JASP-aged 2) on non-dose weighted aligned micrographs. Unaligned frame averages  
508 were manually inspected and judged in terms of ice and protein quality, resulting in a removal  
509 of 19-30 % of the data sets, see [Table 1](#) and [Table 2](#) for details.

510 Particles (F-actin-PHD and 80% of F-actin-PHD-Alexa) were selected manually on  
511 bandpass filtered images with a box size of 256 px and a particle distance of 37 px using  
512 sxheliboxer in SPARX (Hohn et al., 2007). Filaments were only included when they contained  
513 at least six segments. Remaining images of the F-actin-PHD-Alexa data set, F-actin-PHD-aged  
514 and F-actin-JASP-aged 1 were auto-picked using STRIPPER (Wagner, 2018) with a box size  
515 of 256 px and a particle distance of 40 px and 32 px, respectively. The F-actin-JASP-aged 2  
516 data set was auto-picked using the filament mode of crYOLO (Wagner et al., 2019) with a  
517 filament width of 60 px, box distance of 27 px, a minimum number of six segments and on-the-  
518 fly lowpass filtering. To train the crYOLO model 94 micrographs were initially picked  
519 manually using sxheliboxer resulting in  $\sim 15\text{k}$  particles.

520 All following processing steps were performed in Relion-2-beta or Relion-3 (JASP aged  
521 2) (Scheres, 2012; Zivanov et al., 2018). Particles were extracted from dose weighted, aligned  
522 micrographs for all data sets using a box size of 256 px. For F-actin-PHD and F-actin-JASP-  
523 aged 1 particles were additionally binned to 192 px resulting in a pixel size of  $1.52 \text{ \AA}/\text{px}$  and  
524  $1.5 \text{ \AA}/\text{px}$ , respectively. For all data sets except F-actin-JASP-aged 2, particles were furthermore  
525 extracted from micrographs with a total dose of  $25 \text{ e}/\text{\AA}^2$  and  $15 \text{ e}/\text{\AA}^2$  using a box size of 256 px.  
526 The total number of extracted particles is listed in [Table 1](#) and [Table 2](#).

527 For auto-picked particles (subset of F-actin-PHD-Alexa containing 194,777 particles,  
528 F-actin-PHD-aged and both data sets of F-actin-JASP-aged) helical 2D classification was used  
529 to discard false picks and particles of bad quality. As removal of particles can result in gaps  
530 within filaments and this would cause problems during prior calculations (see below), star files  
531 were cleaned up by either splitting filaments into two new filaments or removal if split filaments  
532 would contain less than six segments. The remaining number of particles was 184,566 for the  
533 F-actin-PHD-Alexa subset (merged data set contains 895,735 particles), 1,078,848 for F-actin-

534 PHD-aged, 768,490 for F-actin-JASP-aged 1 and 415,892 for F-actin-JASP-aged 2. Manually  
535 picked particles were not 2D classified.

536 To speed the refinement up, the number of particles for F-actin-PHD-aged and F-actin-  
537 JASP-aged 1 was further reduced by removing all micrographs with a CTF maximum resolution  
538 worse than 4.5 Å and 6.5 Å, respectively, a total drift higher than 15 Å or a per frame drift  
539 higher than 1.12 Å (1 px) resulting in a total of 646,699 and 360,799 particles, respectively.

540 As helical refinement tends to result in over refinement and loss of detail due to  
541 averaging, we used the modified single-particle 3D refinement approach we described in detail  
542 before (Merino et al., 2018). To enable single particle refinement helical priors and flip ratios  
543 were removed from the star files and helical half sets introduced manually. An initial 3D  
544 reference was created from PDB 5JLF (after removal of tropomyosin) (Ecken et al., 2015;  
545 2016) and filtered to 25 Å using SPARX (Hohn et al., 2007) and EMAN2 (Tang et al., 2007).  
546 The initial refinement was performed on binned or full-size dose-weighted particles with a  
547 sampling of 3.7° limiting the tilt angle to 89° (--limit\_tilt 89). As the sampling rate was not  
548 automatically increased to 1.8° for the F-actin-PHD-Alexa and F-actin-PHD-aged data sets, a  
549 follow up refinement using a sampling of 1.8 ° and the previous output map filtered to 7-8 Å as  
550 reference was carried out. Output maps were afterwards filtered to 6-7 Å and used as reference  
551 for a local refinement with a sampling of 0.9° without any angular restraints. Based on those  
552 projection parameters, prior values for the tilt and in plane rotation angles were calculated and  
553 outliers discarded (see (Merino et al., 2018) for details), resulting in a total of 529,081 (F-actin-  
554 PHD), 719,053 (F-actin-PHD-Alexa), 513,783 (F-actin-PHD-aged), 352,285 (F-actin-JASP-  
555 aged 1) and 336,783 (F-actin-JASP-aged 2) particles.

556 All following processing steps were performed on unbinned particles with a total  
557 electron dose of 25 e/Å<sup>2</sup>. Reference maps and star files were rescaled and modified accordingly.  
558 Previously calculated prior values were used as prior distribution restraints (--sigma\_tilt 1 and  
559 --sigma\_psi 1) in the subsequent refinement using a sampling of 0.9° and reducing the shift  
560 range. Scaled maps filtered to 4-5 Å were used as references. Finally, the map quality was  
561 further improved by continuing the last iteration using particles with a total dose of 15 e/Å<sup>2</sup>. In  
562 case of the F-actin-JASP-aged 2 data set the electron dose was not reduced as described before.  
563 Instead CTF refinement and bayesian polishing was performed in Relion-3 (Zivanov et al.,  
564 2018). Polished particles were afterwards used for the final local refinement with prior  
565 restraints.

566 All refinements were performed using a mask. Initial refinements made use of a mask  
567 spanning 85% percent of the filament with an extension of 3 px and softedge of 5 px. Afterwards

568 a mask covering a central sphere with a radius of  $\sim 110$  px, an extension of 4 px and softedge  
569 of 10 px was used in combination with solvent flattening of the FSC.

570 In case of F-actin-PHD, the map quality could be further improved by removing all  
571 micrographs having an overall drift above 6 Å and running a 2D classification without  
572 alignment to remove all classes without features. The last iteration was finally repeated with  
573 this subset containing a total of 405,265 particles. In case of F-actin-PHD-Alexa, the refinement  
574 seemed not to have converged yet. Thus, the final map could be improved by another local auto  
575 refinement using the same particle subset and settings as used for the previous final iteration.

576 For the final post processing we generated a mask containing the central  $\sim 120$  Å of the  
577 filament (as done before (Merino et al., 2018) ) resulting in 3.31 Å for F-actin-PHD, 3.58 Å for  
578 F-actin-PHD-Alexa, 3.67 Å for F-actin-PHD-aged, 3.68 Å for F-actin-JASP-aged 1 and 3.09 Å  
579 for F-actin-JASP-aged 2. Final resolutions, number of micrographs before and after sorting as  
580 well as particles numbers are summarized in [Table 1](#) and [Table 2](#).

581

#### 582 **Local resolution estimation and filtering**

583 Local resolutions were calculated on half maps using Sphire (Moriya et al., 2017), providing  
584 the final average resolution reported by Relion. Half maps sharpened to the automatically  
585 determined B-Factor in Relion's postprocessing were afterwards filtered to local resolution in  
586 Sphire.

587

#### 588 **Model building and refinement**

589 An initial atomic model and cifs library for phalloidin was generated using elBow (Moriarty et  
590 al., 2009) in Phenix (Adams et al., 2011) inputting the SMILES string provided by the ZINC  
591 data base (Irwin and Shoichet, 2005). This model was then manually fitted using cifs restraints  
592 into the central density of phalloidin within Coot (Emsley et al., 2010). The orientation was  
593 unambiguous and in good agreement with a recently published model of an actomyosin  
594 complex including phalloidin (Mentes et al., 2018). Initial F-actin models for F-actin-PHD and  
595 F-actin-PHD-Alexa are based on PDB 5OOD (F-actin-ADP-P<sub>i</sub>, (Merino et al., 2018)). As the  
596 occupancy of P<sub>i</sub> is low it was removed and Jasp-cLys replaced by the previously generated  
597 initial model of phalloidin. PDB 5ONV (F-actin-ADP (Merino et al., 2018)) was used as a  
598 starting model for F-actin-PHD-aged and phalloidin added manually. The model of F-actin-  
599 JASP-aged 2 is based on the final model of F-actin-PHD, where phalloidin was replaced by  
600 JASP and P<sub>i</sub> added, both from PDB 5OOD. Models were docked into the density and adjusted  
601 where necessary using Chimera (Pettersen et al., 2004) and Coot (Emsley et al., 2010). Finally,

602 the central five subunits were fitted individually into the density, HIC73 replaced by HIS for  
603 phalloidin structures and hydrogens added. In all following steps five subunits were included.

604 Consecutive model building and refinement was performed in Rosetta (Wang et al.,  
605 2016). To avoid overfitting, we modelled against one half map (sharpened, broadly masked and  
606 filtered to resolution) and used the other for validation. Helical symmetry was enforced in all  
607 following steps and additional distance constraints applied to ensure proper modelling of  $Mg^{2+}$   
608 and  $P_i$ . For ligands, Rosetta creates an approximate parameter set from the molecule's chemical  
609 nature, assuming that the starting model is close to an energy minimum. For all models except  
610 F-actin-JASP-aged 1 we used between one and three rounds of iterative rebuilding, generating  
611 960 models every round. After convergence assessment, the best scoring model was locally  
612 refined and relaxed using Rosetta with minimization and repacking. When necessary models  
613 were adjusted manually in Coot, followed by another round of iterative rebuilding or local  
614 refinement. Although F-actin-JASP-aged 1 adopts both the open and closed D-loop state, only  
615 the dominant open state was modeled. Considering that F-actin-JASP-aged 1 is a replicate of  
616 F-actin-JASP-aged 2, we used the final model of F-actin-JASP-aged 2 as a starting model and  
617 directly ran a local relaxation after minor adjustments in Coot. Final models were selected based  
618 on the best energy, FSC free, MolProbity (Chen et al., 2010) and EmRinger (Barad et al., 2015)  
619 scores (both calculated calling Phenix functions). Finally, we methylated HIS73 to HIC in all  
620 models of phalloidin-stabilized F-actin and regularized it in its ideal geometry in Coot. For F-  
621 actin-PHD-Alexa we removed residues 43-48 and 374-375 as the tip of the D-loop and the C-  
622 terminus are not sufficiently resolved. Bond and angle outliers of the F-actin-JASP-aged models  
623 were manually corrected in Coot. Finally, we utilized Rosetta for validation, to impose helical  
624 symmetry and calculate B-factors for the two modified F-actin-JASP-aged models. Refinement  
625 statistics of all five models are summarized in [Table 1](#) and [Table 2](#).

626

### 627 **Principle component analysis**

628 Principle component analysis (PCA) was performed using the bio3D library (Grant et al., 2006)  
629 in R (R Core Team, 2017) using the RStudio Interface (RStudio Team, 2015). Models of F-  
630 actin actin in different nucleotide states – AMPPNP PDB: 5OOE, ADP-BeFx PDB:5OOF,  
631 ADP-Pi PDB: 6FHL and ADP PDB: 5ONV (Merino et al., 2018) and in complex with JASP –  
632 bound to ADP-Pi PDB: 5OOD or to ADP PDB: 5OOC (Merino et al., 2018) were included in  
633 addition to the models presented in this manuscript. Only the central actin chain of every model  
634 was used and ligands excluded. Models were aligned with the *pdbsaln* method which uses the  
635 MUSCLE algorithm (Edgar, 2004) for sequence alignment. For superposition of models a

636 stable core of residues was identified with *core.find* and afterwards used for superposition using  
637 *pdffit*. Gaps in the sequence i.e. within the D-loop or C-terminus were excluded in the following  
638 PCA running *px.xray*. Data points were manually grouped for coloring based on bound proteins  
639 or ligands. Trajectories along the principle component axis were created using *mktrj.pca*. Note  
640 that gaps within the D-loop are not visible in the trajectory model as remaining atoms were  
641 renumbered building a continuous chain.

642

### 643 **Structure Visualization**

644 The central subunit or central three subunits were used for the visualization of models and  
645 density maps, as they include all important contact sites and are best resolved. For all surface  
646 representations, models protonated with H<sup>++</sup> (Anandakrishnan et al., 2012) at pH 7.5 with HIC  
647 replaced by HIS were displayed. When not indicated differently, maps filtered to local  
648 resolution were used for all figures. Figures and movies were created with in Chimera  
649 (Pettersen et al., 2004) and modified when necessary using image or movie processing software.  
650 Protein surfaces were colored by hydrophobicity using “define attribute” inputting amino acid-  
651 specific scores (Hessa et al., 2005).

652

### 653 **Data availability**

654 The atomic models and cryo-EM maps are available in the PDB (Burley et al., 2018) and EMDB  
655 databases (Lawson et al., 2011), under accession numbers PDB XXX and EMD-XXXX (F-  
656 actin-PHD); PDB XX and EMD-XX (F-actin-PHD-aged PDB XXXX and EMD-XXXX (F-  
657 actin-PHD-Alexa); PDB XXXX and EMD-XXX (F-actin-JASP-aged 1); and PDB XXXX and  
658 EMD-XXX (F-actin-JASP-aged 2). The datasets generated during and/or analyzed during the  
659 current study are available from the corresponding author upon reasonable request.



## References – Materials and Methods

- Adams, P.D., Afonine, P.V., Bunkóczi, G., Chen, V.B., Echols, N., Headd, J.J., Hung, L.-W., Jain, S., Kapral, G.J., Grosse Kunstleve, R.W., McCoy, A.J., Moriarty, N.W., Oeffner, R.D., Read, R.J., Richardson, D.C., Richardson, J.S., Terwilliger, T.C., Zwart, P.H., 2011. The Phenix software for automated determination of macromolecular structures. *Methods* 55, 94–106. doi:10.1016/j.ymeth.2011.07.005
- Anandakrishnan, R., Aguilar, B., Onufriev, A.V., 2012. H++ 3.0: automating pK prediction and the preparation of biomolecular structures for atomistic molecular modeling and simulations. *Nucleic Acids Research* 40, W537–W541. doi:10.1093/nar/gks375
- Barad, B.A., Echols, N., Wang, R.Y.-R., Cheng, Y., DiMaio, F., Adams, P.D., Fraser, J.S., 2015. EMRinger: side chain-directed model and map validation for 3D cryo-electron microscopy. *Nat. Methods* 12, 943–946. doi:10.1038/nmeth.3541
- Burley, S.K., Berman, H.M., Bhikadiya, C., Bi, C., Chen, L., Di Costanzo, L., Christie, C., Dalenberg, K., Duarte, J.M., Dutta, S., Feng, Z., Ghosh, S., Goodsell, D.S., Green, R.K., Guranović, V., Guzenko, D., Hudson, B.P., Kalro, T., Liang, Y., Lowe, R., Namkoong, H., Peisach, E., Periskova, I., Prlić, A., Randle, C., Rose, A., Rose, P., Sala, R., Sekharan, M., Shao, C., Tan, L., Tao, Y.-P., Valasatava, Y., Voigt, M., Westbrook, J., Woo, J., Yang, H., Young, J., Zhuravleva, M., Zardecki, C., 2018. RCSB Protein Data Bank: biological macromolecular structures enabling research and education in fundamental biology, biomedicine, biotechnology and energy. *Nucleic Acids Research* 47, D464–D474. doi:10.1093/nar/gky1004
- Chen, V.B., Arendall, W.B., Headd, J.J., Keedy, D.A., Immormino, R.M., Kapral, G.J., Murray, L.W., Richardson, J.S., Richardson, D.C., 2010. MolProbity: all-atom structure validation for macromolecular crystallography. *Acta Crystallogr. D Biol. Crystallogr.* 66, 12–21. doi:10.1107/S0907444909042073
- Ecken, von der, J., Heissler, S.M., Pathan-Chhatbar, S., Manstein, D.J., Raunser, S., 2016. Cryo-EM structure of a human cytoplasmic actomyosin complex at near-atomic resolution. *Nature* 534, 724–728. doi:10.1038/nature18295
- Ecken, von der, J., Müller, M., Lehman, W., Manstein, D.J., Penczek, P.A., Raunser, S., 2015. Structure of the F-actin--tropomyosin complex. *Nature* 519, 114–117. doi:10.1038/nature14033
- Edgar, R.C., 2004. MUSCLE: multiple sequence alignment with high accuracy and high throughput. *Nucleic Acids Research* 32, 1792–1797. doi:10.1093/nar/gkh340
- Emsley, P., Lohkamp, B., Scott, W.G., Cowtan, K., 2010. Features and development of Coot. *Acta Crystallogr. D Biol. Crystallogr.* 66, 486–501. doi:10.1107/S0907444910007493
- Grant, B.J., Rodrigues, A.P.C., ElSawy, K.M., McCammon, J.A., Caves, L.S.D., 2006. Bio3d: an R package for the comparative analysis of protein structures. *Bioinformatics* 22, 2695–2696. doi:10.1093/bioinformatics/btl461
- Hessa, T., Kim, H., Bihlmaier, K., Lundin, C., Boekel, J., Andersson, H., Nilsson, I., White, S.H., Heijne, von, G., 2005. Recognition of transmembrane helices by the endoplasmic reticulum translocon. *Nature* 433, 377–381. doi:10.1038/nature03216
- Hohn, M., Tang, G., Goodyear, G., Baldwin, P.R., Huang, Z., Penczek, P.A., Yang, C., Glaeser, R.M., Adams, P.D., Ludtke, S.J., 2007. SPARX, a new environment for Cryo-EM image processing. *J. Struct. Biol.* 157, 47–55. doi:10.1016/j.jsb.2006.07.003
- Irwin, J.J., Shoichet, B.K., 2005. ZINC--a free database of commercially available compounds for virtual screening. *J Chem Inf Model* 45, 177–182. doi:10.1021/ci049714
- Lawson, C.L., Baker, M.L., Best, C., Bi, C., Dougherty, M., Feng, P., van Ginkel, G., Devkota, B., Lagerstedt, I., Ludtke, S.J., Newman, R.H., Oldfield, T.J., Rees, I., Sahni, G., Sala, R., Velankar, S., Warren, J., Westbrook, J.D., Henrick, K., Kleywegt, G.J.,

- Berman, H.M., Chiu, W., 2011. EMDDataBank.org: unified data resource for CryoEM. *Nucleic Acids Research* 39, D456–64. doi:10.1093/nar/gkq880
- Mentes, A., Huehn, A., Liu, X., Zwolak, A., Dominguez, R., Shuman, H., Ostap, E.M., Sindelar, C.V., 2018. High-resolution cryo-EM structures of actin-bound myosin states reveal the mechanism of myosin force sensing. *Proc. Natl. Acad. Sci. U.S.A.* 110, 201718316. doi:10.1073/pnas.1718316115
- Merino, F., Pospich, S., Funk, J., Wagner, T., Küllmer, F., Arndt, H.-D., Bieling, P., Raunser, S., 2018. Structural transitions of F-actin upon ATP hydrolysis at near-atomic resolution revealed by cryo-EM. *Nat. Struct. Mol. Biol.* 25, 528–537. doi:10.1038/s41594-018-0074-0
- Moriarty, N.W., Grosse Kunstleve, R.W., Adams, P.D., 2009. electronic Ligand Builder and Optimization Workbench (eLBOW): a tool for ligand coordinate and restraint generation. *Acta Crystallogr. D Biol. Crystallogr.* 65, 1074–1080. doi:10.1107/S0907444909029436
- Moriya, T., Saur, M., Stabrin, M., Merino, F., Voicu, H., Huang, Z., Penczek, P.A., Raunser, S., Gatsogiannis, C., 2017. High-resolution Single Particle Analysis from Electron Cryo-microscopy Images Using SPHIRE. *J Vis Exp* e55448–e55448. doi:10.3791/55448
- Pardee, J.D., Spudich, J.A., 1982. Purification of muscle actin. *Meth. Enzymol.* 85 Pt B, 164–181.
- Pettersen, E.F., Goddard, T.D., Huang, C.C., Couch, G.S., Greenblatt, D.M., Meng, E.C., Ferrin, T.E., 2004. UCSF Chimera--a visualization system for exploratory research and analysis. *J Comput Chem* 25, 1605–1612. doi:10.1002/jcc.20084
- R Core Team, 2017. R: A language and environment for statistical computing. <https://www.R-project.org/>
- RStudio Team, 2015. RStudio. <http://www.rstudio.com>
- Scheres, S.H.W., 2012. RELION: implementation of a Bayesian approach to cryo-EM structure determination. *J. Struct. Biol.* 180, 519–530. doi:10.1016/j.jsb.2012.09.006
- Stabrin, M., 2018. TranSPHIRE. doi:<https://doi.org/10.5281/zenodo.2553388>
- Tang, G., Peng, L., Baldwin, P.R., Mann, D.S., Jiang, W., Rees, I., Ludtke, S.J., 2007. EMAN2: an extensible image processing suite for electron microscopy. *J. Struct. Biol.* 157, 38–46. doi:10.1016/j.jsb.2006.05.009
- Wagner, T., 2018. STRIPPER. [http://sphire.mpg.de/wiki/doku.php?id=stripper&s\[\]=stripper](http://sphire.mpg.de/wiki/doku.php?id=stripper&s[]=stripper)
- Wagner, T., Merino, F., Stabrin, M., Moriya, T., Antoni, C., Apelbaum, A., Hagel, P., Sitsel, O., Raisch, T., Prumbaum, D., Quentin, D., Roderer, D., Tacke, S., Siebolds, B., Schubert, E., Shaikh, T.R., Lill, P., Gatsogiannis, C., Raunser, S., 2019. SPHIRE-crYOLO is a fast and accurate fully automated particle picker for cryo-EM. *Commun Biol* 2, 218. doi:10.1038/s42003-019-0437-z
- Wang, R.Y.-R., Song, Y., Barad, B.A., Cheng, Y., Fraser, J.S., DiMaio, F., 2016. Automated structure refinement of macromolecular assemblies from cryo-EM maps using Rosetta. *Elife* 5, e17219. doi:10.7554/eLife.17219
- Zheng, S.Q., Palovcak, E., Armache, J.-P., Verba, K.A., Cheng, Y., Agard, D.A., 2017. MotionCor2: anisotropic correction of beam-induced motion for improved cryo-electron microscopy. *Nat. Methods.* doi:10.1038/nmeth.4193
- Zivanov, J., Nakane, T., Forsberg, B.O., Kimanius, D., Hagen, W.J., Lindahl, E., Scheres, S.H., 2018. New tools for automated high-resolution cryo-EM structure determination in RELION-3. *Elife* 7. doi:10.7554/eLife.42166

660 **Supplementary information**

661

662 **Figure S1. Overview of original cryo-EM data and resolutions. Related to Table 1 and**  
663 **Table 2.**

664 (A) Representative micrographs at  $\sim -1.5 \mu\text{m}$  defocus (scale bar 500 Å) (B) and their power  
665 spectra. (C) Local resolution of all reconstructions illustrating the intrinsic flexibility of F-actin  
666 resulting in a gradual decrease of resolution towards the ends of the filament. (D) Fourier shell  
667 correlation (FSC) curves for the masked (black), unmasked (green) and phase-randomized (red)  
668 maps. While the FSC plots for the unmasked maps clearly show that there is no over-refinement  
669 in the reconstructions, the phase-randomized curves prove that the masking has no effect on the  
670 estimated resolution. FSCs were calculated for a 120-Å-long central section of the filament.

671

672 **Figure S2. Comparison of nucleotide binding clefts. Related to Figure 2 and Figure 5.**

673 (A-E) Overlay of atomic models of (A) F-actin-PHD (blue), (B) F-actin-PHD-aged (green), (C)  
674 F-actin-PHD-Alexa (turquoise), (D) F-actin-JASP-aged 1 (purple) and (E) F-actin-JASP-aged  
675 2 (lavender) with F-actin-ADP-P<sub>i</sub> (grey, PDB: 6FHL (Merino et al., 2018)). For clarity only the  
676 atomic model of the nucleotide of F-actin-ADP-P<sub>i</sub> is shown. The nucleotide density of F-actin-  
677 ADP-P<sub>i</sub> (EMDB: 4259: (Merino et al., 2018)) is additionally shown as a pink mesh to highlight  
678 the absence (F-actin-PHD-aged) or consistency of the position of the inorganic phosphate (P<sub>i</sub>)  
679 (all other structures). As the density of P<sub>i</sub> is weak for F-actin-PHD and F-actin-PHD-Alexa  
680 (highlighted by a darker shade of orange) it was not included into the corresponding atomic  
681 models. Superposition of models furthermore illustrates the conservation of the nucleotide  
682 binding pocket and active site. Shown densities (grey with the nucleotide highlighted in orange)  
683 are central subunits of locally filtered maps from this manuscript.

684

685 **Figure S3. Hydrophobic nature and overlap of phalloidin and JASP binding sites. Related**  
686 **to Figure 3 and Figure 6.**

687 (A-B) Side and (C) tilted top views of the central phalloidin binding site highlighting large  
688 hydrophobic patches on all three subunits of F-actin. F-actin is depicted as surface and colored  
689 by hydrophobicity from high (yellow) to low (white, see [Methods](#) for details). Dashed lines  
690 indicate boundaries of actin subunits. The extra density, possibly corresponding to an ion is  
691 depicted in pink. (D-F) Same views as in (A-C) with an additional overlay of JASP (red mesh,  
692 EMDB: 3837 (Pospich et al., 2017)) illustrating that phalloidin (yellow) and JASP do not only  
693 share their binding site but also a key hydrophobic indole group. Also see [Movie S3](#).

694

695

696 **Figure S4. Overview of subdomain organization and localization loops associated with  $P_i$**   
697 **release. Related to Movie S4.**

698 Front (A) and back (B) view of the F-actin protomer illustrating the domain organization and  
699 location of the termini and important loops. To highlight the nucleotide in the central cleft it is  
700 displayed as a surface (orange). (C) Close-up view of the backside of the nucleotide pocket  
701 with emphasize on loops in close vicinity.

702

703 **SI Movie legends**

704

705 **Movie S1. Conformations at the intra-strand interface, Related to Figure 1 and Figure 4.**

706 Illustration of the intra-strand interface of all structures. The interface is made up by the D-loop  
707 and C-terminus of adjacent subunits within one strand and can adopt the open (F-actin-PHD,  
708 F-actin-JASP-aged 2) or closed state (F-actin-PHD-aged) as well as a mixture of both (F-actin-  
709 PHD-Alexa, F-actin-JASP-aged 2). Filament overview and close-up view of the interface of  
710 (A-B) F-actin-PHD (shades of blue), (C-D) F-actin-PHD-aged (shades of green), (E-F) F-actin-  
711 PHD-Alexa (shades of turquoise), (G-H) F-actin-JASP-aged 1 (shades of purple) and (I-J) F-  
712 actin-JASP-aged 2 (shades of lavender). Nucleotides and phalloidin/JASP are colored in orange  
713 and yellow, respectively.

714

715 **Movie S2. Nucleotides bound to phalloidin and JASP-stabilized F-actin structures,**  
716 **Related to Figure 2 and Figure 5.**

717 Illustration of the nucleotide binding cleft of all structures allowing the unambiguous  
718 identification of the bound nucleotide (orange) as either ADP (F-actin-PHD-aged) or ADP- $P_i$   
719 (all structures with different  $P_i$  occupancies). Filament overview and close-up view of the  
720 binding site of (A-B) F-actin-PHD (shades of blue), (C-D) F-actin-PHD-aged (shades of green),  
721 (E-F) F-actin-PHD-Alexa (shades of turquoise), (G-H) F-actin-JASP-aged 1 (shades of purple)  
722 and (I-J) F-actin-JASP-aged 2 (shades of lavender). Both F-actin-PHD and F-actin-PHD-Alexa  
723 have only weak density for the inorganic phosphate ( $P_i$ , highlighted by a darker shade of  
724 orange), thus, it was not included into the atomic models. Also see [Figure 2](#), [Figure 5](#) and [Figure](#)  
725 [S2](#), which also include residue labels.

726

727 **Movie S3. Binding site of phalloidin and jasplakinolide, Related to Figure 3 and Figure**  
728 **6.**

729 Illustration of the phalloidin and JASP (both yellow) binding site consisting of three subunits  
730 from both strands. Filament overview and close-up view of the binding site of **(A-B)** F-actin-  
731 PHD (shades of blue), **(C-D)** F-actin-PHD-aged (shades of green), **(E-F)** F-actin-PHD-Alexa  
732 (shades of turquoise), **(G-H)** F-actin-JASP-aged 1 (shades of purple) and **(I-J)** F-actin-JASP-  
733 aged 2 (shades of lavender). The extra density which is present in all phalloidin structures and  
734 possibly corresponds to an ion is shown as red mesh in close-up views. Nucleotides are colored  
735 in orange. Also see [Figure 3](#), [Figure 6](#), which also include residue labels, and [Figure S3](#).

736

737 **Movie S4. Structural changes upon PO<sub>4</sub> release in phalloidin-stabilized F-actin. Related**  
738 **to Figure S4.**

739 Illustration of structural changes between the reconstructions of F-actin-PHD (blue) and F-  
740 actin-PHD-aged (green) which can be attributed to the release of P<sub>i</sub> from the active site. The  
741 video is based on a morph of the corresponding electron density maps of the central F-actin  
742 subunit. **(A)** Overview of the electron density map of F-actin-PHD. **(B)** Close-up view of the  
743 nucleotide binding pocket with focus on Mg<sup>2+</sup> (green) and P<sub>i</sub> (orange). In absence of P<sub>i</sub>  
744 (transition from blue to green), Mg<sup>2+</sup> moves towards the previously occupied position.  
745 Moreover, both phosphate binding loop 2 (turquoise, residues 156-159) and switch loop,  
746 including the methylated His73, (pink, residues 70-78) move inwards partially closing the  
747 empty P<sub>i</sub> site. **(C)** Tilted view focusing on the inwards movement of phosphate binding loop 2.  
748 An additional smaller movement of phosphate binding loop 1 (green, residues 14-16) can be  
749 noticed. **(D)** Tilted top view showing the movement of the two phosphate binding loops. The  
750 switch loop known to be of importance for phosphate release follows the inwards movement  
751 and is furthermore in direct contact with phalloidin (yellow). **(E)** Side view with focus on the  
752 switch loop. The proline rich loop (dark red, residues 108-112) also undergoes a minor  
753 structural change and is visible in the background. **(F)** Backside view of the complete subunit  
754 illustrating the domain movement of SD 1 and SD 2. Upon P<sub>i</sub> release (transition from blue to  
755 green), structural rearrangements within the aforementioned loops are transmitted to connected  
756 subunits (primarily SD 2) and eventually cause the downward movement of SD 2 and the  
757 adjacent SD 1 which is accompanied by a conformational change of the D-loop and C-terminus.  
758 Note that neighboring subunits within one filament might also contribute to the observed  
759 structural changes considering the essential intra-strand interactions of the D-loop and C-  
760 terminus of two adjacent subunits. Phalloidin (yellow) directly interacts with both the switch

761 (pink) and proline rich loop (dark red). Arg177 was proposed to shuttle  $P_i$ , but does not change  
762 its position in this morph. **(G)** Side view showing the downward movement of SD 2  
763 accompanied by refolding of the D-loop and C-terminus. **(H)** Front view illustrating the motion  
764 of SD 2 and SD 1, followed by a small movement of SD 3 which is linked to the D-loop of the  
765 adjacent subunit through the W-loop (khaki, 165-172), especially Tyr169. For every view the  
766 morph of F-actin-PHD (blue, bound ADP and sub stoichiometric amounts of  $P_i$ ) and F-actin-  
767 PHD-aged (green, bound ADP) is looped twice for two different density thresholds each (one  
768 optimized for the visualization of  $P_i$  and the other for  $Mg^{2+}$ ). Throughout **(B-H)** the atomic  
769 model F-actin-PHD is displayed for better orientation. An atomic model of  $P_i$  (not included into  
770 the atomic model of F-actin-PHD) is additionally shown in **(B-D)** to guide the identification of  
771 the corresponding density. For an overview of the domain organization and localization of loops  
772 in the F-actin protomer also see [Figure S4](#).

773

774 **Movie S5. Variation along the first principle component of the PC analysis, Related to**  
775 **Figure 7.**

776 Illustration of the variations within the central F-actin monomer projected onto the first  
777 principle component. **(Left panel)** Plot of the first and second principle component (also see  
778 [Figure 7](#)). The black line highlights the propagation of the model (right panel) along the  
779 corresponding principle component. **(Right panel)** Trajectory representing an interpolation  
780 between the two most dissimilar structures in the distribution along the first principle  
781 component, namely F-actin-ADP and F-actin-JASP-ADP. As the changes are subtle and  
782 difficult to appreciate, four different orthogonal views are provided including **A)** front, **B-C)**  
783 two side views and **D)** top view. The dominant variation is an upwards rotation of SD 1 and SD  
784 2 accompanied by the reorganization of both the D-loop and C-terminus, similar to what we  
785 have reported previously (Merino et al., 2018). Only  $C\alpha$  atoms present in all structures were  
786 used for the analysis, thus, part of the D loop and the C terminus were not included and are also  
787 missing in the shown model. Both, the D-loop (residues 37-53, blue arrow head) and one  
788 connecting loop (126-129, grey arrow head) show high variation. While the change of the D-  
789 loop is supported by the electron density maps, changes in the other loop are not meaningful as  
790 the corresponding electron density is often fragmented and thus does not allow reliable  
791 modelling.

792

793 **Movie S6. Variation along the second principle component of the PC analysis, Related to**  
794 **Figure 7.**

795 Illustration of the variations within the central F-actin monomer projected onto the second  
796 principle component. **(Left panel)** Plot of the first and second principle component (also see  
797 [Figure 7](#)). The black line highlights the propagation of the model (right panel) along the  
798 corresponding principle component. **(Right panel)** Trajectory representing an interpolation  
799 between the two most dissimilar structures in the distribution along the second principle  
800 component, namely F-actin-JASP-aged 1 and F-actin-AMPPNP. As the changes are partially  
801 subtle and difficult to appreciate, four different orthogonal views are provided including **A)**  
802 front, **B-C)** two side views and **D)** top view. The dominant variation is an rotation or torsion of  
803 SD 1 and SD 2 against SD 3 and SD 4. Only C $\alpha$  atoms present in all structures were used for  
804 the analysis, thus, part of the D loop and the C terminus were not included and are also missing  
805 in the shown model. The D-loop (residues 37-53, blue arrow head) and two additional loops  
806 (126-129, grey arrow head and 23-27, green arrow head) show noticeable variation. The motion  
807 of loop 126-129 is however not meaningful as described in the legend of [Movie S5](#).

808

809 **Movie S7. Variation along the third principle component of the PC analysis, Related to**  
810 **Figure 7.**

811 Illustration of the variations within the central F-actin monomer projected onto the third  
812 principle component. **(Left panel)** Plot of the first and third principle component (also see  
813 [Figure 7](#)). The black line highlights the propagation of the model (right panel) along the  
814 corresponding principle component. **(Right panel)** Trajectory representing an interpolation  
815 between the two most dissimilar structures in the distribution along the third principle  
816 component, namely F-actin-PHD-aged and F-actin-ADP-Pi. As the changes are subtle and  
817 difficult to appreciate, four different orthogonal views are provided including **A)** front, **B-C)**  
818 two side views and **D)** top view. The dominant variation resembles a breathing motion of the  
819 complete monomer into all direction. Only C $\alpha$  atoms present in all structures were used for the  
820 analysis, thus, part of the D loop and the C terminus were not included and are also missing in  
821 the shown model. The D-loop (residues 37-52) is labeled with a blue arrowhead.

**Figure S1. Overview of original cryo-EM data and resolutions.**

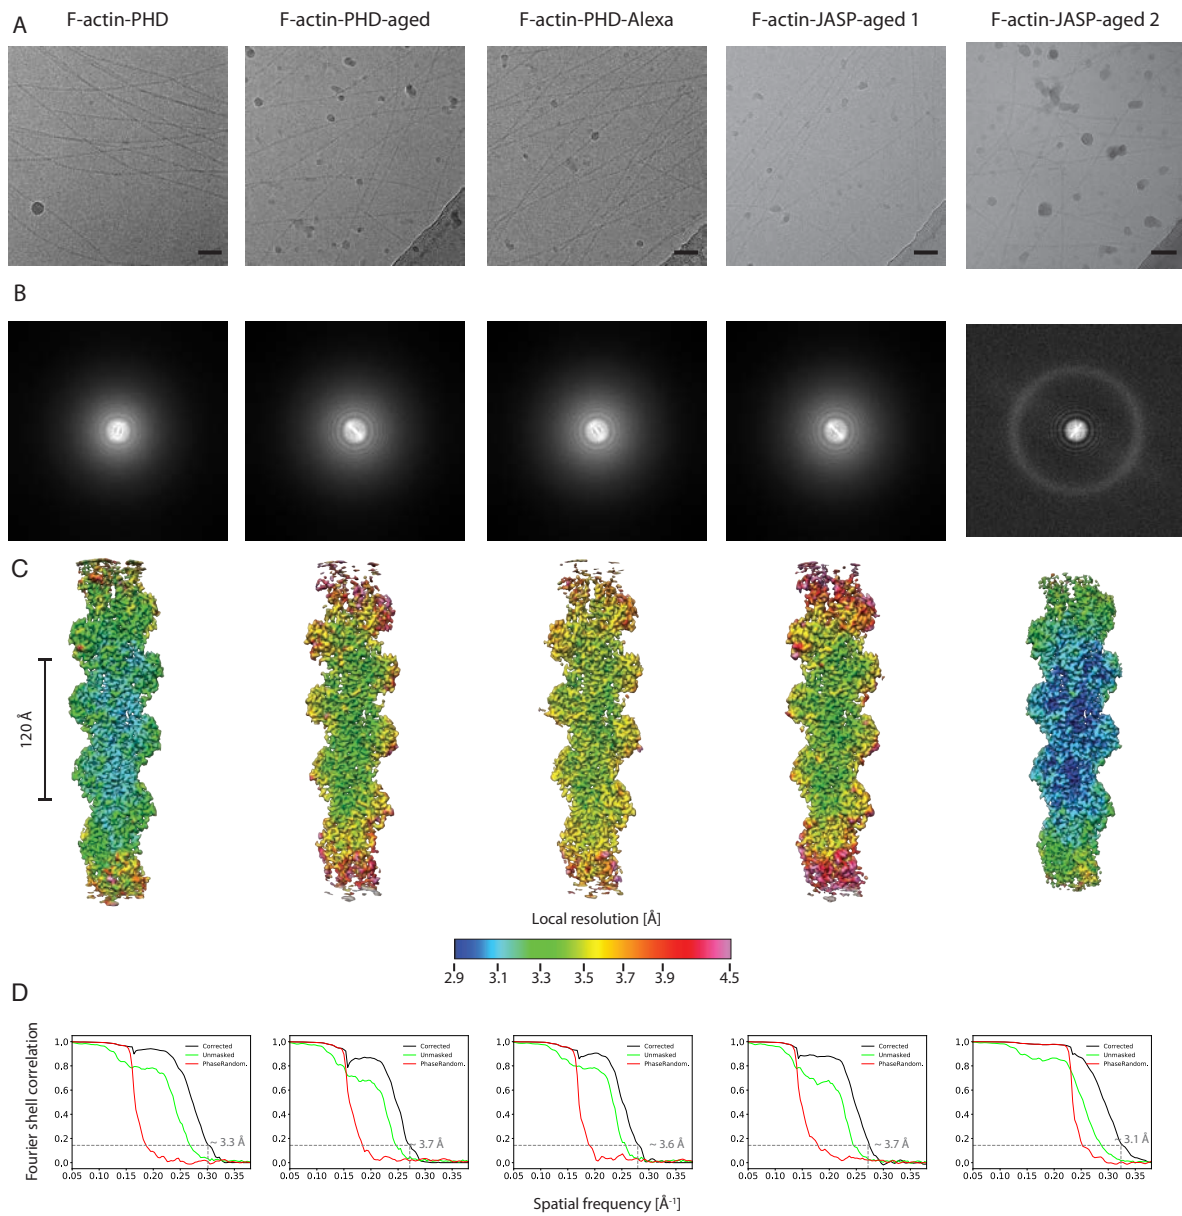



**Figure S2. Comparison of nucleotide binding clefts.**

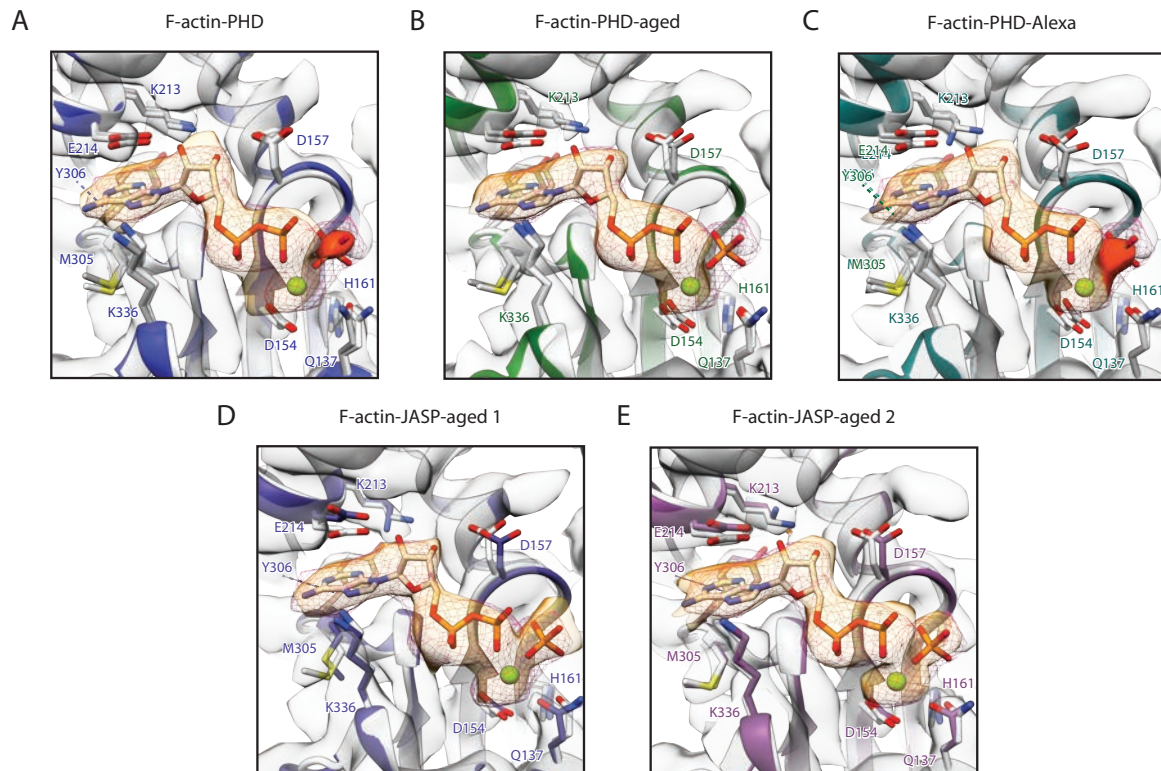

**Figure S3. Hydrophobic nature and overlap of phalloidin and JASP binding sites.**

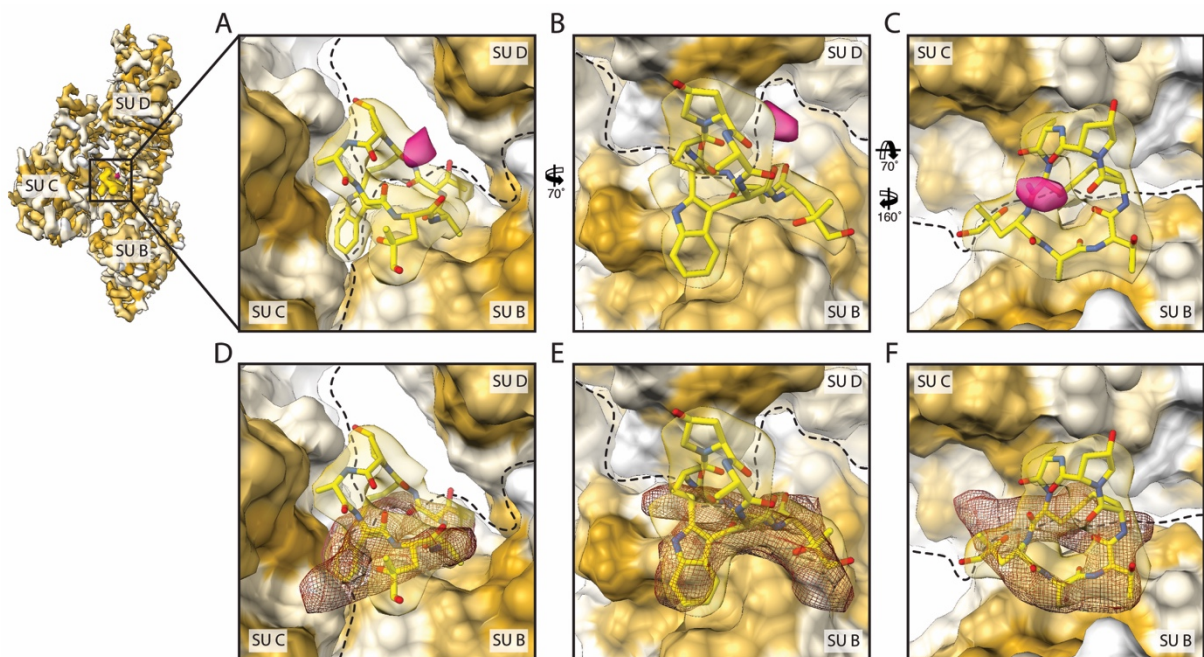

**Figure S4. Overview of subdomain organization and localization loops associated with P<sub>i</sub> release.**

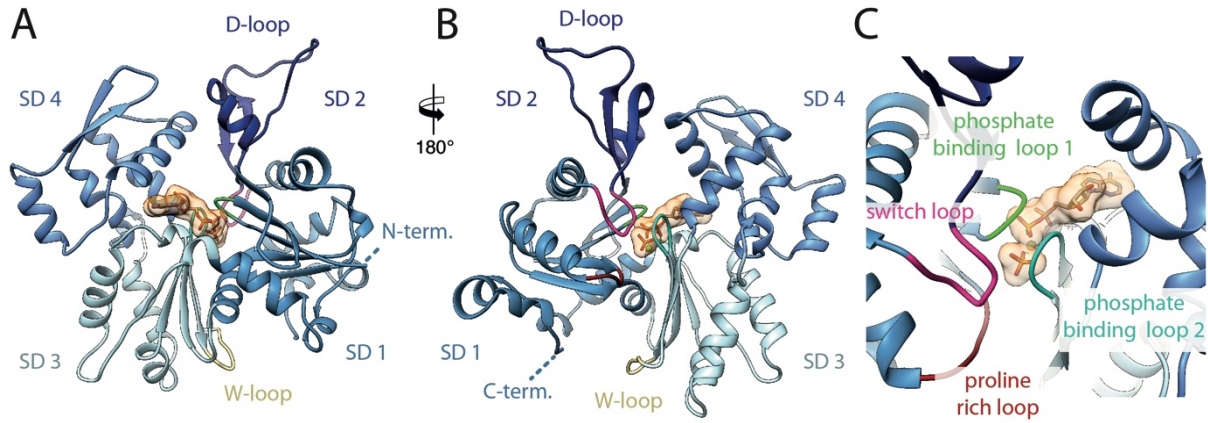

Source: https://www.biorxiv.org/content/10.1101/794495v1.full.pdf
